1 **Long Read Annotation (LoReAn): automated eukaryotic genome annotation**  
2 **based on long-read cDNA sequencing**

3

4 David E. Cook<sup>1,2†</sup>, Jose Espejo Valle-Inclan<sup>1,3†</sup>, Alice Pajoro<sup>4,5</sup>, Hanna  
5 Rovenich<sup>1,6</sup>, Bart PHJ Thomma<sup>1\$\*</sup>, and Luigi Faino<sup>1,7\$\*</sup>

6

7 <sup>1</sup>Laboratory of Phytopathology, Wageningen University and Research,  
8 Droevendaalsesteeg 1, 6708 PB Wageningen, The Netherlands

9 <sup>2</sup>Current address: Department of Plant Pathology, Kansas State University,  
10 Manhattan KS, USA.

11 <sup>3</sup>Current address: Department of Genetics, Center for Molecular Medicine,  
12 University Medical Center Utrecht, Utrecht University. Utrecht, The Netherlands.

13 <sup>4</sup>Laboratory of Molecular Biology, Wageningen University and Research,  
14 Droevendaalsesteeg 1, 6708 PB Wageningen, The Netherlands

15 <sup>5</sup>Current address: Department of Plant Developmental Biology, Max Planck  
16 Institute for Plant Breeding Research, 50829 Köln, Germany

17 <sup>6</sup>Current address: Botanical Institute, Cluster of Excellence on Plant Sciences  
18 (CEPLAS), University of Cologne, 50674 Cologne, Germany

19 <sup>7</sup>Current address: Department of Environmental Biology, University La Sapienza,  
20 Rome, Italy

21

22 † Contributed equally

23 \$ Contributed equally

24 \* Correspondence: Bart PHJ Thomma, email [bart.thomma@wur.nl](mailto:bart.thomma@wur.nl)

25 Luigi Faino, email [luigi.faino@uniroma1.it](mailto:luigi.faino@uniroma1.it)

26 **Abstract**

27 Single-molecule full-length cDNA sequencing can aid genome annotation by  
28 revealing transcript structure and alternative splice-forms, yet current annotation  
29 pipelines do not incorporate such information. Here we present LoReAn (Long  
30 Read Annotation) software, an automated annotation pipeline utilizing short- and  
31 long-read cDNA sequencing, protein evidence, and *ab initio* prediction to  
32 generate accurate genome annotations. Based on annotations of two fungal and  
33 two plant genomes, we show that LoReAn outperforms popular annotation  
34 pipelines by integrating single-molecule cDNA sequencing data generated from  
35 either the PacBio or MinION sequencing platforms, and correctly predicting gene  
36 structure and capturing genes missed by other annotation pipelines.

37

38 **Keywords:**

39 RNA-seq; third-generation sequencing; long-read sequencing; annotation; gene  
40 prediction; full-length cDNA

41

## 42 **Background**

43 Genome sequencing has advance nearly every discipline within the biological  
44 sciences, as the ongoing decreasing sequencing costs and increasing  
45 computational capacity allows many laboratories to pursue genomics-based  
46 answers to biological questions. New sequencing technologies designed to  
47 sequence longer contiguous DNA molecules, such as Pacific Biosciences'  
48 (PacBio) Single Molecule Real Time sequencing (SMRT) and Oxford Nanopore  
49 Technologies' (ONT) MinION, have ushered the most recent genomics revolution  
50 [1]. These advances are further enhancing the ability to generate high-quality  
51 genome assemblies of large, complex eukaryotic genomes [2-5].

52 A high-quality genome assembly, represented by (near-)chromosome  
53 completion, can help to address many biological questions, but often requires  
54 functional features to be further defined [6]. The process of genome annotation,  
55 i.e. the identification of protein-coding genes and their structural features such as  
56 intron-exons boundaries, is important to capture biological values of a genome  
57 assembly [7]. Genomes can be annotated using computer algorithms in so-called  
58 *ab initio* gene predictions, as well as using wet-lab generated data, such as  
59 cDNA or protein datasets for evidence-based predictions, and current annotation  
60 pipelines typically incorporate both types of data [7,8]. *Ab initio* gene prediction  
61 tools are based on statistical models, most often Hidden Markov Models (HMMs),  
62 that are trained using known proteins, and typically perform well at predicting  
63 conserved or core genes [7,9]. However, the *ab initio* prediction accuracy  
64 decreases for organism-specific genes, for genes encoding small proteins and

65 those containing introns in untranslated regions (UTRs). Furthermore, *ab initio*  
66 annotation of non-model genomes remains challenging as appropriate training  
67 data is not always available. To improve genome annotations, cDNA sequencing  
68 (RNA-seq) data can be incorporated to train *ab initio* software [10] and to provide  
69 additional evidence for defining accurate gene models [11]. However, it remains  
70 challenging to annotate a genome with short-read RNA-seq data due to  
71 difficulties in unequivocally mapping these reads, and because single reads do  
72 not span a gene's full length. Consequently, the coding structure must be  
73 computational inferred.

74 Current annotation pipelines use a combination of *ab initio* and evidence-  
75 based predictions to generate accurate consensus annotations. MAKER2 is a  
76 user-friendly, fully automated annotation pipeline that incorporates multiple  
77 sources of gene prediction information and has been extensively used to  
78 annotate eukaryotic genomes [12-16]. The Broad Institute Eukaryotic Genome  
79 Annotation Pipeline (here referred to as BAP) has mainly been used to annotate  
80 fungal genomes [17-19] and integrates multiple programs and evidences for  
81 genome annotation [20,21]. CodingQuarry is another gene prediction software  
82 that utilizes general HMMs for gene prediction using both RNA-seq data and  
83 genome sequence [22]. A limitation of these annotation pipelines is that they give  
84 little weight to experimental evidence such as short read RNA-seq and cannot  
85 exploit gene structure information from single-molecule cDNA sequencing.

86 In addition to improving the genome assembly [23], long-read sequencing  
87 data can be used to improve genome annotation. The use of single-molecule

88 cDNA sequencing can increase the accuracy of automated genome annotation  
89 by improving genome mapping of sequencing data, correctly identifying intron-  
90 exon boundaries, directly identifying alternatively spliced transcripts, identifying  
91 transcription start and end sites, and providing precise strand orientation to single  
92 exons genes [24-26]. However, several hurdles limit the implementation of long-  
93 read sequencing data into automated genome annotation, such as the higher  
94 per-base costs when compared to short-read data, the relatively high error rates  
95 for long-read sequencing technologies, and the lack of bioinformatics tools to  
96 integrate long-read data into current annotation pipelines [27,28]. The first two  
97 limitations are addressed by the continual reduction in sequencing cost and  
98 improving base calling by long-read sequencing providers, and the development  
99 of bioinformatics methods to correct for sequencing errors [29,30]. To address  
100 the disconnection between genome annotation pipelines and the latest  
101 sequencing technologies, we developed the Long Read Annotation (LoReAn)  
102 pipeline. LoReAn is an automated annotation pipeline that takes full advantage of  
103 MinION or PacBio SMRT long-read sequencing data in combination with protein  
104 evidence and *ab initio* gene predictions for full genome annotation. Short-read  
105 RNA-seq can be used in LoReAn to train *ab initio* software. Based on the re-  
106 annotation of two fungal and two plant species, we demonstrate that LoReAn can  
107 provide annotations with increased accuracy by incorporating single-molecule  
108 cDNA sequencing data from different sequencing platforms.

109

110

## 111 **Results**

### 112 **Long-read annotation (LoReAn) design and implementation**

113 The LoReAn pipeline can be conceptualized in two phases. The first phase  
114 involves genome annotation based on *ab initio* and evidence-based predictions  
115 (Fig. 1a: blue arrows) and largely follows the workflow previously described in the  
116 BAP [20,21]. This first phase produces a full-genome annotation and requires the  
117 minimum input of a reference genome, protein sequence of known and, possibly,  
118 related species, and a species name from the Augustus prediction software  
119 database [31]. Two changes were implemented into the first phase of LoReAn,  
120 which we refer to as BAP+. One alteration is that LoReAn uses RNA-seq reads  
121 as input in combination with the BRAKER1 software [10] to produce a species-  
122 specific database for the Augustus prediction software. Additionally, RNA-seq  
123 data is assembled into full-length cDNA using Trinity software [32] and the  
124 assembled transcripts are aligned to the genome using both PASA [20] and  
125 GMAP [33]. The output of PASA software is passed to Evidence Modeler (EVM)  
126 [20] as cDNA evidence while the output of GMAP is given to EVM as *ab initio*  
127 software. GMAP output passed as *ab initio*-evidence guarantees that genes not  
128 predicted by *ab initio* software like Augustus and GeneMark but present in the  
129 transcriptome are passed to Evidence Modeler.

130 The second phase of LoReAn incorporates single-molecule cDNA  
131 sequencing with the annotation results of the first phase by utilizing a novel  
132 approach to reconstruct full-length transcripts (Fig. 1a: red arrows). Single-  
133 molecule long-read sequencing reads are mapped to the genome using GMAP,

134 which allows the determination of transcript structure (i.e. start, stop and exon  
135 boundaries) from a single cDNA molecule [34]. The underlying reference  
136 sequence is extracted to overcome sequence errors associated with long-read  
137 sequencing, and these sequences are combined with the gene models from the  
138 first phase in a process we refer to as ‘clustered transcript reconstruction’ (Fig 1a  
139 and b). Through this process, consensus gene models are built by combining the  
140 first and second phase gene models that cluster at the same locus. Optionally,  
141 model clustering can be done in a strand-specific manner (LoReAn stranded,  
142 main text in Additional file 1 for details) where only gene models mapping on the  
143 same DNA coding strand are used to build a consensus model. These high-  
144 confidence models are mapped back to the reference using GMAP to correct  
145 open reading frames and subsequently, PASA is used to update the gene  
146 models by identifying untranslated regions (UTRs) and alternatively spliced  
147 transcripts to generate a final annotation. Sequence-based support for the final  
148 gene models (Fig. 1b orange models) can come from the first phase annotation  
149 alone (Fig. 1b i), the second phase given a sufficient level of support (Fig. 1b ii,  
150 iii), or through a combination of the two phases (Fig. 1b iv, v). If a single  
151 consensus annotation cannot be reached between the two phases, both  
152 annotations are kept in the final output (Fig. 1b v).

153

### 154 **LoReAn produces the highest accuracy gene predictions**

155 To test the performance of LoReAn, we re-annotated the genome sequence of  
156 the haploid fungus *Verticillium dahliae*, an important pathogen of hundreds of

157 plant species including many crops [35,36]. The genome of *V. dahliae* strain JR2  
158 was used for testing LoReAn because it is assembled into complete  
159 chromosomes and has a manually curated annotation, providing a high-  
160 confidence resource for reference [2]. The output of 54 annotations were  
161 compared, of which 24 were produced using LoReAn, 12 using BAP and 12  
162 using BAP+ with different genome masking and *ab initio* options (description in  
163 Additional file 1), along with output from the annotation software MAKER2,  
164 CodingQuarry, BRAKER1, Augustus and two from GeneMark-ES (Fig 2a;  
165 Additional file 2: Table S1). The quality of the annotation outputs were  
166 determined by comparing each to the reference annotation for exact matches to  
167 either genes, transcripts or exon locations. These comparisons were used to  
168 calculate sensitivity (how much of the reference is correctly predicted), specificity  
169 (how much of the prediction is in the reference), and accuracy (an average of  
170 sensitivity and specificity). We calculated these metrics based on commonly  
171 described methods used within the gene prediction community (see methods and  
172 references [7,37,38]). Genome masking prior to annotation significantly affected  
173 the accuracy of predicted gene models, with partially masked or non-masked  
174 genome inputs producing the most accurate annotations (Fig 2a; Additional file 1:  
175 Fig S1a - S3a, Additional file 2: Table S2). On average, the ‘fungus’ option of the  
176 *ab initio* software GeneMark-ES produced the most accurate gene, transcript,  
177 and exon predictions (Fig 2a; Additional file 1: Fig S1b - S3b; Additional file 2:  
178 Table S2 – S4). Gene predictions from LoReAn using coding strand information



179 (LoReAn-s) had the highest accuracy across the tested conditions for exact  
180 match genes to the reference annotation (Fig. 2a; Table 1).

181 A single output from LoReAn, BAP, MAKER2 and CodingQuarry were  
182 selected for in-depth comparison (Fig. 2a, horizontal lines highlighted in yellow;  
183 Fig. 2b). The LoReAn-stranded run using the 'fungus' option of GeneMark-ES  
184 (referred to as LoReAn-sF throughout) and the BAP run using the fungus option  
185 of GeneMark-ES (referred to as BAP-F throughout) using a non-masked genome  
186 as input were selected because they had the highest accuracy and used similar  
187 settings, thereby enabling comparisons (Additional file 2: Table S1). Default  
188 settings for MAKER2 and CodingQuarry were run with as similar input to the  
189 LoReAn and BAP pipelines as possible. The LoReAn-sF output had the highest  
190 gene and exon sensitivity and specificity compared to the other three pipelines,  
191 showing a 13% increase in gene sensitivity and 9% increase in gene specificity  
192 compared to the next best performing pipeline, BAP-F (Fig. 2b).

193 Collectively, the results from testing gene prediction options and pipelines  
194 show that genome masking prior to annotation and *ab initio* options can impact  
195 the quality of a genome annotation. Across the tested settings, the LoReAn  
196 pipeline produces the highest quality gene predictions when compared to the  
197 reference annotation. Overall, LoReAn-stranded produced the best annotation  
198 predictions, highlighting that incorporating single-molecule cDNA information in  
199 the annotation process significantly improves the output.

200  
201  
202

203 Table 1: Annotation quality metrics for exact match genes for  
204 the tested pipelines

| Pipeline <sup>c</sup> | Sensitivity <sup>b</sup> | Specificity <sup>b</sup> | Accuracy <sup>b</sup> |
|-----------------------|--------------------------|--------------------------|-----------------------|
| BAP <sup>a</sup>      | 50.0%                    | 60.5%                    | 55.3%                 |
| BAP+ <sup>a</sup>     | 50.7%                    | 58.7%                    | 54.7%                 |
| LoReAn <sup>a</sup>   | 57.3%                    | 61.0%                    | 59.2%                 |
| LoReAn-s <sup>a</sup> | 57.5%                    | 63.2%                    | 60.3%                 |
| MAKER2                | 49.8%                    | 54.5%                    | 52.1%                 |
| CodingQuarry          | 50.7%                    | 57.0%                    | 53.8%                 |
| Augustus              | 47.8%                    | 53.0%                    | 50.4%                 |
| BRAKER1               | 43.4%                    | 54.4%                    | 49.9%                 |
| GeneMark-ES           | 42.4%                    | 50.7%                    | 46.6%                 |
| GeneMark-ES+Fungus    | 47.5%                    | 54.4%                    | 51.0%                 |

205 <sup>a</sup>Results from the highest quality annotation are shown

206 <sup>b</sup>Each quality metric was calculated against the *V. dahliae* strain JR2 reference. Details  
207 on how each was calculated and their definitions can be found in the Methods section.

208 <sup>c</sup>Pipelines: BAP - Broad Annotation Pipeline; BAP+ - modified BAP; LoR\_M - LoReAn  
209 using masked input genome; LoR - LoReAn; LoR\_S\_M - LoReAn stranded mode using  
210 masked input genome; LoR\_S - LoReAn stranded mode.

211

## 212 **LoReAn predicts the greatest number of high-confidence genes compared** 213 **to other pipelines**

214 The four best gene predictions; LoReAn-sF, BAP-F, MAKER2 and  
215 CodingQuarry, were compared head-to-head in the absence of a reference  
216 annotation to determine differences in gene prediction. There were 4,584 genes  
217 with the same predicted structure (i.e. start, stop, intron position) from the 4  
218 pipelines, equivalent to approximately 40% of the genes in the reference  
219 annotation (Fig. 3a). BAP predicted the fewest unique genes (1,352), while  
220 MAKER2 predicted the most (3,157) (Fig. 3a). However, the use of exact match  
221 gene structure to identify unique coding sequence is potentially misleading, as  
222 two gene predictions can code for the same or a similar protein without the exact  
223 same structure. To generate a more biologically relevant comparison of unique

224 protein coding differences, we grouped translated protein sequences of each  
225 annotation into homologous groups using orthoMCL [39,40]. Using these groups,  
226 we identified protein coding sequences that were unique to a single annotation  
227 pipeline, referred to as singletons. We identified 1,429 singletons across the four  
228 annotations, with CodingQuarry predicting the most (461) and BAP-F predicting  
229 the fewest (180). The validity of the singletons were analyzed by checking their  
230 support from short-read RNA-seq data. Coding sequences from the LoReAn-sF  
231 protein singletons averaged 80% coverage across the predicted gene model's  
232 length, statistically significantly greater than the singleton coverage from the  
233 other pipelines (Fig. 3b). The log<sub>2</sub> length of the singletons did not significantly  
234 change across the LoReAn-sF, BAP-F and MAKER2 results (Fig. 3c).  
235 Additionally, we checked the singletons for introns, and grouped them by RNA-  
236 seq coverage, as genes with introns and RNA-seq support are more likely to be  
237 true genes. Singletons that contain at least one intron and have RNA-seq reads  
238 covering at least 75% of their length were considered the highest-confidence  
239 models. The LoReAn-sF pipeline had the greatest number of singletons in this  
240 high-confidence category, 241, which represents 55.1% of the total singletons  
241 predicted by the pipeline. MAKER2 also predicted many singletons in this  
242 category, 176, which was 50.1% of the singletons predicted by the pipeline (Fig.  
243 3d, green wedge). In contrast, the CodingQuarry and BAP-F pipelines predicted  
244 the most low-confidence singletons, those with no introns and lower RNA-seq  
245 support, representing a greater proportion of the singletons predicted by the  
246 pipelines (Fig. 3d). For research projects aimed at identifying new protein coding

247 genes, these results suggest the LoReAn-sF pipeline offers the greatest chance  
248 at identifying novel, high-confidence protein coding genes.

249

250 **LoReAn gene predictions are the most accurate based on reference**  
251 **independent analysis**

252 To evaluate the annotation output in the absence of a reference, we devised an  
253 approach to quantify annotation accuracy based on empirical data. The locations  
254 of predicted introns from the annotation outputs were compared to the locations  
255 of the inferred introns from long- and short-read mapped data. This analysis  
256 shows that LoReAn outputs using non- or partially masked genomes have the  
257 highest exact match intron accuracy (Fig. 4, points closest to top right corner). To  
258 validate this approach, the exact match intron accuracy from mapped reads were  
259 correlated with the to exact match gene accuracy from the reference annotation.  
260 This analysis shows a significant positive correlation between the reference  
261 dependent and independent assessments ( $r = 0.88$ ,  $p\text{-value} < 2.2e\text{-}16$ , spearman  
262 correlation) (Additional file 1: Fig. S4). This indicates that the empirical annotation  
263 assessment is an alternative method to assess gene prediction accuracy in the  
264 absence of an annotation or the absence of a high-confidence annotation.

265

266 **Only the LoReAn pipeline correctly annotates the *Ave1* effector locus**

267 Plant-pathogenic fungi encode *in planta*-secreted proteins, termed effectors,  
268 which serve to facilitate infection [41,42]. Effectors are generally characterized as  
269 lineage-specific small, secreted, cysteine-rich proteins with generally no

270 characterized protein domains or homology, characteristics which can make  
271 effectors difficult to predict with automated annotation [43]. To test how LoReAn  
272 and the other annotation pipelines performed at a specific effector locus, we  
273 detailed the annotation results for the *V. dahliae* *Ave1* locus, which encodes a  
274 small-secreted protein that functions to increase virulence during plant infection  
275 [44]. As previously reported, a considerable number of short RNA-seq reads  
276 uniquely map to the *Ave1* locus [44], along with single-molecule cDNA reads  
277 identified here (Fig. 5a). Interestingly, the MAKER2, BAP, and CodingQuarry  
278 pipelines, along with the Augustus and GeneMark-ES software fail to predict the  
279 previously characterized *Ave1* gene, despite the abundance of uniquely-mapped  
280 reads (Fig. 5b; Additional file 1: Fig. S5). Intriguingly, the MAKER2 and BAP  
281 pipelines predict a separate gene on the opposite strand located to the 3' end of  
282 the *Ave1* gene that is absent in the reference annotation. The LoReAn-sF and  
283 BAP+ pipelines predict two genes at the locus, one corresponding to the known  
284 *Ave1* gene, and an additional gene to the 3' end of *Ave1* (called *Ave1c*), similar  
285 to the gene model identified by MAKER2 and BAP (Fig. 5b; Additional file 1: Fig.  
286 S5).

287 LoReAn-sF additionally predicts two mRNAs corresponding to the  
288 previously characterized *Ave1* gene, termed isoform-1 and -2 (Fig. 5b). To  
289 confirm the presence of two *Ave1* isoforms, cDNAs were amplified and cloned  
290 into vectors, and 18 clones were randomly selected for sequencing. A majority of  
291 the sequenced transcripts, 15 of 18, have a sequence corresponding to isoform-  
292 1, the known *Ave1* transcript, while the other 3 were the isoform-2 sequence (Fig.

293 5c). The isoform-2 transcript is the result of an alternative splice junction 5 bp  
294 upstream of the previously identified splice site in the *Ave1* 5' UTR intron, and is  
295 not predicted to alter the protein coding sequence. The accuracy of the new gene  
296 prediction at the *Ave1* locus (two *Ave1* isoforms and one additional gene model)  
297 was additionally tested by showing the expression of the *Ave1c* gene. Two sets  
298 of primers (*Ave1* and *Ave1c* fw and rev) amplified bands of the expected sizes,  
299 confirming the expression of both genes across various *V. dahliae* growth  
300 conditions (Fig. 5d). We also attempted to amplify a specific product from both  
301 gDNA and cDNA to confirm the orientation and rule out a transcriptional fusion  
302 (Fig. 4d, primers *Ave1* fw + *Ave1c* fw). Consistent with the annotation, the  
303 amplification using a gDNA template was successful, while the cDNA template  
304 failed to amplify a product. Collectively, these results confirm that LoReAn  
305 predicts the most accurate gene models at the *Ave1* locus, including a splice-  
306 variant of *Ave1*.

307

### 308 **LoReAn produces the most accurate annotation of a second fungal** 309 **genome using PacBio Iso-seq reads**

310 The basidiomycete *Plicaturopsis crispa*, mostly known for its wood-degrading  
311 abilities, has a relatively complex transcriptome with high levels of exons per  
312 gene; 5.6 exons per gene compared to *V. dahliae*'s 2.5 exons per gene [45].  
313 Using the settings identified for the *V. dahliae* genome annotation, nine  
314 annotations of the *P. crispa* genome were generated using publicly available  
315 short-read Illumina RNA-seq and single-molecule PacBio Iso-seq data [46]. The

316 LoReAn annotations predicted the greatest number of genes, transcripts and  
 317 exons, while BAP and BAP+ had the greatest number of genes, transcripts and  
 318 exons exactly matching the reference (Table 2). Likewise, the BAP and BAP+  
 319 gene, transcript and exon prediction had the highest accuracy when compared to  
 320 the reference annotation (Fig. 6a). However, the validity of these results is  
 321 dependent on the quality of the reference annotation. To better understand the  
 322 output from the annotations in the absence of a potentially confounding  
 323 reference, the empirical intron analysis was used. Using this analysis of exact  
 324 match introns, all four LoReAn-based predictions had the highest accuracy, and  
 325 were even better than the current public reference (Fig. 6b). These results  
 326 indicate the LoReAn pipeline produces an improved annotation to the current  
 327 reference based on the mapped RNA-seq data, and that LoReAn using strand  
 328 information from the sequencing data provides the most accurate annotation of  
 329 the *P. crispera* genome.

330

331 Table 2. Predicted features for *P. crispera* annotation analysis.

| <b>Pipelines<sup>c</sup></b> | <b>Genes (13,626)<sup>a</sup></b> |                          | <b>Transcripts (13,636)<sup>a</sup></b> |                          | <b>Exons (76,761)<sup>a</sup></b> |                          |
|------------------------------|-----------------------------------|--------------------------|-----------------------------------------|--------------------------|-----------------------------------|--------------------------|
|                              | Total Predicted                   | Exact Match <sup>b</sup> | Total Predicted                         | Exact Match <sup>b</sup> | Total Predicted                   | Exact Match <sup>b</sup> |
| Genemark-ES                  | 11,396                            | 4,426                    | 11,396                                  | 4,426                    | 73,930                            | 56,206                   |
| Augustus                     | 11,640                            | 4,976                    | 11,640                                  | 4,976                    | 72,936                            | 57,648                   |
| BAP                          | 11,831                            | 5,489                    | 11,831                                  | 5,489                    | 74,598                            | 59,693                   |
| BAP+                         | 11,583                            | 5,485                    | 11,583                                  | 5,485                    | 72,683                            | 59,045                   |
| MAKER2                       | 8,602                             | 2,477                    | 11,196                                  | 2,477                    | 62,312                            | 44,201                   |
| LoRean_M                     | 14,690                            | 5,114                    | 15,760                                  | 5,114                    | 75,158                            | 57,921                   |
| LoRean                       | 14,698                            | 5,112                    | 15,765                                  | 5,112                    | 75,228                            | 57,935                   |
| LoRean_s_M                   | 12,821                            | 5,118                    | 13,931                                  | 5,118                    | 74,514                            | 57,773                   |
| LoRean_s                     | 12,828                            | 5,132                    | 13,943                                  | 5,132                    | 74,512                            | 57,749                   |

332 <sup>a</sup>The number of reference genes, transcripts and exons are shown in  
333 parentheses.

334 <sup>b</sup>The Exact match column shows the number of predicted features that have the  
335 exact genomic location as the reference feature.

336 <sup>c</sup>Pipelines: BAP - Broad Annotation Pipeline; BAP+ - modified BAP; LoReAn\_M -  
337 LoReAn using masked input genome; LoReAn - LoReAn; LoReAn\_s\_M - LoReAn  
338 stranded mode using masked input genome; LoReAn\_s - LoReAn stranded  
339 mode.

340

341

## 342 **LoReAn produces high quality annotations for larger plant genomes using** 343 **PacBio Iso-seq data**

344 To further test LoReAn, the 135 megabase (Mb) *Arabidopsis thaliana* and 375  
345 Mb *Oryza sativa* (rice) genomes were re-annotated using Pacbio Iso-seq data.

346 These genomes are larger and contain a higher percentage of repetitive  
347 elements than the two fungal genomes tested. The Arabidopsis annotations  
348 generated here were compared to the reference annotation, TAIR10, which is  
349 highly curated and represents one of the most complete plant genome  
350 annotations [47,48]. The LoReAn outputs using a non-masked genome had the  
351 highest number of genes and transcripts exactly matching the reference, while  
352 BAP+ had the highest number of exact match exons (Table 3). The four LoReAn  
353 predictions had the highest exact match accuracy compared to the reference for  
354 genes, transcripts, and exons (Fig. 7a) We additionally tested the quality of the  
355 annotations using exact intron matches to the mapped reads as described  
356 earlier. This analysis also shows that the LoReAn outputs were the most  
357 accurate and most closely match the TAIR10 reference annotation (Fig. 7b).

358



359 Table 3. Predicted features for *Arabidopsis thaliana* annotation analysis

| Pipelines <sup>c</sup> | Genes (27,416) <sup>a</sup> |                          | Transcripts (35,386) <sup>a</sup> |                          | Exons (147,492) <sup>a</sup> |                          |
|------------------------|-----------------------------|--------------------------|-----------------------------------|--------------------------|------------------------------|--------------------------|
|                        | Total Predicted             | Exact Match <sup>b</sup> | Total Predicted                   | Exact Match <sup>b</sup> | Total Predicted              | Exact Match <sup>b</sup> |
| Genemark-ES            | 31,358                      | 13,758                   | 31,358                            | 14,975                   | 173,189                      | 118,265                  |
| Augustus               | 27,954                      | 15,288                   | 27,954                            | 16,797                   | 161,197                      | 121,196                  |
| BAP                    | 29,640                      | 15,341                   | 29,640                            | 16,825                   | 163,015                      | 121,083                  |
| BAP+                   | 29,152                      | 17,246                   | 29,152                            | 18,993                   | 153,341                      | 122,826                  |
| MAKER2                 | 14,881                      | 8,424                    | 15,138                            | 9,554                    | 99,905                       | 88,676                   |
| LoReAn_M               | 24,665                      | 17,053                   | 25,302                            | 19,036                   | 133,837                      | 119,641                  |
| LoReAn                 | 29,313                      | 17,416                   | 29,946                            | 19,412                   | 152,154                      | 122,214                  |
| LoReAn_s_M             | 24,504                      | 17,072                   | 25,144                            | 19,040                   | 133,693                      | 119,559                  |
| LoReAn_s               | 29,145                      | 17,419                   | 29,782                            | 19,405                   | 152,105                      | 122,230                  |

360 <sup>a</sup>The number of reference genes, transcripts and exons are shown in  
 361 parentheses.

362 <sup>b</sup>The Exact match column shows the number of predicted features that have the  
 363 exact genomic location as the reference feature.

364 <sup>c</sup>Pipelines: BAP - Broad Annotation Pipeline; BAP+ - modified BAP; LoReAn\_M -  
 365 LoReAn using masked input genome; LoReAn - LoReAn; LoReAn\_s\_M - LoReAn  
 366 stranded mode using masked input genome; LoReAn\_s - LoReAn stranded  
 367 mode.

368

369       Comparable results were obtained for the *O. sativa* annotation. The BAP  
 370 pipeline had the highest number of predicted genes, transcripts and exons  
 371 exactly matching to the reference annotation, followed by the outputs from the  
 372 LoReAn predictions (Table 4). However, the four LoReAn predictions had the  
 373 greatest specificity and accuracy for genes, transcripts and exons compared to  
 374 the reference annotation (Fig. 7c). The overall level of agreement between the  
 375 pipelines and the reference is lower for *O. sativa* than for *Arabidopsis* (compare  
 376 x-axis, Fig. 7a and 7c), likely reflecting the difference in reference annotation  
 377 quality. Using the exact intron matches to the mapped reads analysis, the  
 378 LoReAn gene predictions have the highest accuracy for exact intron matches,

379 even greater than the reference annotation (Fig. 7d). These data suggest  
 380 LoReAn produced annotations are more accurate than the currently used  
 381 reference annotation with respect to RNA-seq mapping data.

382

383 Table 4. Predicted features for *Oryza sativa* annotation analysis.

| Pipelines <sup>c</sup> | Genes (35,679) <sup>a</sup> |                          | Transcripts (42,132) <sup>a</sup> |                          | Exons (140,914) <sup>a</sup> |                          |
|------------------------|-----------------------------|--------------------------|-----------------------------------|--------------------------|------------------------------|--------------------------|
|                        | Total Predicted             | Exact Match <sup>b</sup> | Total Predicted                   | Exact Match <sup>b</sup> | Total Predicted              | Exact Match <sup>b</sup> |
| Genemark-ES            | 62,836                      | 1,132                    | 62,836                            | 1,190                    | 512,183                      | 4552                     |
| Augustus               | 46,264                      | 7,705                    | 46,264                            | 8,310                    | 205,377                      | 79,968                   |
| BAP                    | 75,360                      | 11,253                   | 75,360                            | 12,241                   | 209,909                      | 88,114                   |
| BAP+                   | 35,420                      | 7,254                    | 35,420                            | 7,921                    | 150,207                      | 76,298                   |
| MAKER2                 | 26,142                      | 4,267                    | 32,897                            | 4,690                    | 159,907                      | 78,609                   |
| LoReAn_M               | 27,543                      | 9,686                    | 32,296                            | 10,648                   | 122,167                      | 78,292                   |
| LoReAn                 | 37,365                      | 10,134                   | 41,846                            | 11,102                   | 152,682                      | 82,217                   |
| LoReAn_s_M             | 27,251                      | 9,609                    | 31,998                            | 10,649                   | 122,215                      | 78,397                   |
| LoReAn_s               | 37,024                      | 10,037                   | 41,516                            | 11,107                   | 152,760                      | 82,362                   |

384 <sup>a</sup>The number of reference genes, transcripts and exons are shown in  
 385 parentheses.

386 <sup>b</sup>The Exact match column shows the number of predicted features that have the  
 387 exact genomic location as the reference feature.

388 <sup>c</sup>Pipelines: BAP - Broad Annotation Pipeline; BAP+ - modified BAP; LoReAn\_M -  
 389 LoReAn using masked input genome; LoReAn - LoReAn; LoReAn\_s\_M - LoReAn  
 390 stranded mode using masked input genome; LoReAn\_s - LoReAn stranded  
 391 mode.

392

## 393 **Discussion**

394 High throughput sequencing continues to have profound impacts on biological  
395 systems and the questions researchers are addressing. The technical  
396 improvements and associated reduction in cost have resulted in a deluge of high  
397 quality model and non-model genomes from across the kingdoms of life. To  
398 capture the value of these assembled genomes, equal advances are needed in  
399 defining the functional elements of the genome. One such technical advance is  
400 the ability to sequence full-length single-molecule cDNAs that directly contain  
401 information on transcript structure and alternative forms. This information has  
402 previously helped identify alternatively spliced transcripts [26,49], but single-  
403 molecule long-reads have not been systematically incorporated into annotation  
404 pipelines. The newly developed LoReAn pipeline integrates both short-read  
405 RNA-seq and long-read single-molecule cDNA sequencing with *ab initio* gene  
406 prediction to generate high accuracy gene predictions. In total, three separate  
407 analyses using a reference annotation, head-to-head comparison, or comparison  
408 to empirical data indicate that LoReAn produces the highest quality annotations  
409 of the four genomes tested. These results show that LoReAn has improved  
410 performance for predicting gene structures.

411       Whereas several genome annotation tools use experimental data (i.e.  
412 RNA-seq) for gene prediction, none of them fully utilize this information. This is  
413 apparent for genes such as *Ave1*, where there is ample RNA-seq evidence  
414 supporting the gene model, but most of the tested software fail to predict the  
415 gene. This result may be related to the small size of the *Ave1* transcript and the

416 lack of homologs present in fungal databases. The ability to correctly annotate  
417 genes with unique features or restricted taxonomic distribution is relevant to  
418 many biological questions and will aid comparative genomic studies. We  
419 designed LoReAn to provide more weight and incorporate more information from  
420 both short- and long-read RNA-seq data as we believe with increasing  
421 sequencing depth, length and accuracy this significant source of empirical  
422 evidence will greatly improve gene prediction.

423         The technical and biological characteristics of a genome impacts the  
424 annotation options that will influence annotation quality. Genome masking  
425 significantly affected the gene prediction output of the *V. dahliae* annotation.  
426 From a technical aspect, genome masking prior to annotation likely has the  
427 greatest impact when annotating highly contiguously assembled genomes.  
428 Fragmented genome assemblies often lack repetitive regions and are *de facto*  
429 masked. Masking the telomere-to-telomere complete *V. dahliae* strain JR2  
430 genome resulted in gene predictions which were fragmented because of coding  
431 regions overlapping masked regions. Our results indicate that genome masking  
432 of short repetitive DNA decreases the quality of the genome annotation, and that  
433 using a partial- or non-masked genome may improve annotation results when  
434 using long-read data. From a biological perspective, our results show that strand  
435 information had a significant impact on annotation quality for the two smaller,  
436 more compact fungal genomes. Compact fungal genomes have genes with  
437 overlapping UTRs which make gene prediction difficult. Using strand information,  
438 LoReAn can assign transcripts to the correct coding strand and avoid the

439 prediction of fused genes. Additionally, strand information is used to assign  
440 single exon genes to the correct strand. These results need to be confirmed on a  
441 greater number of genomes with diverse characteristics before being fully  
442 generalizable. Collectively, our results suggest that both technical and biological  
443 information, such as assembly completeness, coding sequence overlap, and  
444 intron number per coding sequence impact genome annotation quality and  
445 should be considered early during project design.

446 Our results show that LoReAn can successfully use single-molecule cDNA  
447 sequencing data from different platforms to produce high-quality genome  
448 annotations, similar to or better than the current community references for four  
449 diverse genomes. This shows that the LoReAn pipeline can effectively use  
450 single-molecule cDNA sequencing data across the current sequencing platforms  
451 and performs well for annotating a small fungal genome of 35 Mb to the rice  
452 genome of ~375 Mb. We speculate that the use of annotation software such as  
453 LoReAn that incorporates single-molecule cDNA sequencing into the annotation  
454 process will significantly improve genome annotation and aid in answering  
455 biological questions across all domains of life.

456

## 457 **Conclusions**

458 We present the automated genome annotation software Long Read Annotation  
459 (LoReAn) that builds on previous annotation software to incorporate both short-  
460 and long-read sequencing data. This pipeline is shown to perform well using both  
461 Oxford Nanopore and Pacific Biosciences produced long-reads and for

462 annotation projects ranging from compact fungal genomes to larger more  
463 complex plant genomes. As more labs utilize single-molecule cDNA sequencing  
464 to address their specific biological questions, LoReAn will provide an efficient and  
465 effective automated annotation pipeline for diverse projects.

466

467

## 468 **Methods**

### 469 **Growth conditions and RNA extraction**

470 *Verticillium dahliae* strain JR2 [2], was maintained on potato dextrose agar (PDA)  
471 plates grown at approximately 22°C and stored in the dark. Conidiospores were  
472 collected from two-week-old PDA plates using half-strength potato dextrose broth  
473 (PDB), and subsequently  $1 \times 10^6$  spores were inoculated into glass flasks  
474 containing 50 mL of either PDB, half-strength Murashige and Skoog (MS)  
475 medium supplemented with 3% sucrose, or xylem sap collected from greenhouse  
476 grown tomato plants of the cultivar Moneymaker. The cultures were grown for  
477 four days in the dark at 22°C and 160 RPM. The cultures were strained through  
478 miracloth (22  $\mu$ m) (EMD Millipore, Darmstadt, Germany), pressed to remove  
479 liquid, and flash frozen in liquid nitrogen. Next, the cultures were to ground to  
480 powder with a mortar and pestle using liquid nitrogen to ensure samples  
481 remained frozen.

482 RNA extraction was carried out using TRIzol (Thermo Fisher Science,  
483 Waltham, MA, USA) following manufacturer guidelines. Following RNA re-  
484 suspension, contaminating DNA was removed using the TURBO DNA-free kit  
485 (Ambion, Thermo Fisher Science, Waltham, MA, USA) and the RNA was  
486 checked for integrity by separating 2  $\mu$ L of each sample on a 2% agarose gel.  
487 RNA samples were quantified using a Nanodrop (Thermo Fisher Science,  
488 Waltham, MA, USA) and stored at -80°C.

489

490

491 **Library preparation and sequencing – Illumina**

492 Each RNA sample from *V. dahliae* strain JR2 grown in PDB, half-strength MS,  
493 and xylem sap was used to construct an Illumina sequencing library for RNA-  
494 sequencing by the Beijing Genomics Institute (BGI) following manufacturer  
495 guidelines (Illumina Inc., San Diego, CA, USA). Briefly, messenger RNA (mRNA)  
496 was enriched using oligo(dT) magnetic beads. The RNA was then fragmented  
497 and double stranded cDNA synthesized following manufacturer guidelines  
498 (Illumina Inc., San Diego, CA, USA). The fragments were then end-repaired and  
499 poly-adenylated to allow for the addition of sequencing adapters, followed by  
500 fragment enrichment using polymerase chain reaction (PCR) amplification.  
501 Library quality was assessed using the Agilent 2100 Bioanalyzer (Agilent  
502 Technologies, Santa Clara, CA, USA). Qualified libraries were sequenced on an  
503 Illumina HiSeq-2000 (Illumina Inc., San Diego, CA, USA) at the Beijing Genomics  
504 Institute.

505

506 **cDNA synthesis and normalization, library preparation and sequencing –**  
507 **Oxford Nanopore Technologies**

508 For the synthesis of single-stranded cDNA, 1 µg of each RNA sample was  
509 reverse-transcribed using the Mint-2 cDNA synthesis kit as described by the  
510 manufacturer (Evrogen, Moscow, Russia), using the primers PlugOligo-1 (5' end)  
511 and CDS-1 (3' end). For each sample, 1 µl of cDNA was amplified with PCR for  
512 15 cycles (95°C for 15 seconds, 66°C for 20 seconds and 72°C for 3 minutes) to



513 generate double-stranded cDNA, and purified with 1.8x volume Agencourt  
514 AMPure XP magnetic beads (Beckman Coulter Inc., Indianapolis, IN, USA).

515 Three cDNA samples were normalized with the Trimmer-2 cDNA  
516 normalization kit following the manufacturer's guidelines (Evrogen, Moscow,  
517 Russia). The cDNA was precipitated, denatured and hybridized for 5 hours. Next,  
518 the double stranded cDNA fraction was cleaved and the remaining single  
519 stranded cDNA amplified with PCR for 18 cycles (95°C for 15 seconds, 66°C for  
520 20 seconds and 72°C for 3 minutes).

521 Library preparation for the three samples was performed using the  
522 Nanopore Sequencing Kit (v. SQK-MAP006) following the manufacturer's  
523 guidelines (Oxford Nanopore Technologies [ONT], Oxford, UK). The cDNA was  
524 end-repaired and dA-tailed using the NEBNext End Repair and NEBNext dA-  
525 Tailing Modules following the manufacturer's instructions (New England BioLabs  
526 [NEB], Ipswich, MA, USA). The reactions were cleaned using an equal volume of  
527 Agencourt AMPure XP magnetic beads (Beckman Coulter Inc., Indianapolis, IN,  
528 USA), followed by ONT adapter ligation using Blunt/TA ligation Master Mix (NEB,  
529 Ipswich, MA, USA). The adapter-ligated fragments were purified using  
530 Dynabeads MyOne Streptavidin C1 (Thermo Fisher Science, Waltham, MA,  
531 USA).

532 Sequencing was performed on three different MinION flow cells (v. FLO-  
533 MAP103, ONT, Oxford, UK). After priming the flow cells with sequencing buffer, 6  
534 µl of the library preparation was added. Additional library preparation (6 µl) was  
535 added to the flow cells at 3, 17 and 24 hours after the run was started. Base-

536 calling was performed using the Metrichor app (v. 2.39.1, ONT, Oxford, UK) and  
537 Poretools (v. 0.5.1) was used to generate FASTQ files from the Metrichor  
538 produced FAST5 files [50].

539

#### 540 **Software in LoReAn pipeline**

541 LoReAn is implemented in Python3. Usage and parameters to run LoReAn,  
542 including default settings are detailed at  
543 <https://github.com/lfaino/LoReAn/blob/master/OPTIONS.md>. Mandatory  
544 parameters are protein sequences of related organisms, a reference genome  
545 sequence and an identification name for the species from the Augustus  
546 database. Other inputs are: short-reads (i.e. Illumina RNA-seq) which may be  
547 single or paired-end; and long-reads from either MinION or SMRT sequencing  
548 platforms. LoReAn outputs a GFF3 file with genome annotations.

549 The most convenient way to install and run LoReAn is by using the Docker  
550 (<https://www.docker.com/>) image. Information about the software and how to use  
551 it can be found at <https://github.com/lfaino/LoReAn> repository. LoReAn uses the  
552 following programs and versions: for read mapping, STAR (version 2.5.3a) [51]  
553 and GMAP (v. 2017-06-20) [33]; to assemble and reconstruct transcripts from  
554 short reads, Trinity (v. 2.2.0) [32] ran on “genome-guided mode”, followed by  
555 PASA (v. 2.1.0) [20]; to map protein sequences, AAT is utilized (v. 03-05-2011)  
556 [52]; for gene prediction GeneMark-ES (v4.34) [53] and Augustus (v3.3) [31] are  
557 used as *ab initio* software; BRAKER1 (v. 2) [10] is used in substitution of  
558 Augustus to generate *ab initio* gene prediction for organism not present in the

559 Augustus catalogue when RNA-seq is supplied; GMAP (v. 2017-06-20) [33] is  
560 used for long reads mapping and for assembled ESTs after Trinity assembly;  
561 Evidence Modeler (EVM, v. 1.1.1) [20] is used to combine the output from the  
562 previous tools to generate a combined annotation model. To extract the genomic  
563 sequence, merge and cluster the long-reads, Bedtools suite (v. 2.21.0) [54] is  
564 used. iAssembler (v. 1.32) [55] calls a consensus on the clusters (i.e. the process  
565 of transcript reconstruction). GenomeTools (v. 1.5.9) software is used at several  
566 stages in the LoReAn pipeline [56]. Additional informations about the tools used  
567 can be found at <https://github.com/lfaino/LoReAn/blob/master/README.md>.

568

## 569 **Genome Masking**

570 To study the effect of genome masking on automated genome annotation with  
571 LoReAn, we ran the pipeline on stranded mode using three reference genomes  
572 with different levels of repetition masking: a fully masked genome with all  
573 repetitive sequences masked, a partially masked genome where only repetitions  
574 larger than 400 base pairs (bps) were masked and a full genome with no  
575 repetition masking. Repeats were masked using RepeatMasker software as  
576 previously described [57].

577

## 578 **LoReAn Stranded Mode**

579 To use the software in strand mode efficiently, sequences from the same  
580 transcript need to have the same strand. However, sequencing is random and,  
581 depending from which fragment and sequencing starts, we can have fragments

582 from the same transcript sequenced in forward or reverse orientation compared  
583 to the transcription direction. Unlike DNA sequencing, in cDNA long-read  
584 sequencing, the direction of the sequencing can be inferred by localizing only  
585 one between the 3' adapter or the 5' adapter used during the cDNA production or  
586 localizing both. Using the Smith-Waterman alignment, we can identify the  
587 location of the adapter/s in the sequenced fragments and adjust the sequencing  
588 orientation based on the adapter alignment onto the fragments. For the MinION  
589 data we generated, we used the 5' PlugOligo-1  
590 AAGCAGTGGTATCAACGCAGAGTACGCGGG and 3'-CDS  
591 AAGCAGTGGTATCAACGCAGAGTACTGGAG primer sequences associated  
592 with the cDNA synthesis and normalization process to identify the coding strand  
593 for each long read. For PacBio *Arabidopsis thaliana* experiment, we used the  
594 primers AAGCAGTGGTATCAACGCAGAGTACGCGGG and the primer  
595 AAGCAGTGGTATCAACGCAGAGTACTTTTT for the correction of the transcript  
596 orientation. *Oryza sativa* and *Plicaturopsis crispa* PacBio transcripts were  
597 oriented by using the sequence  
598 AAAAAAAAAAAAAAAAAAAAAAAAAAAAAAAAAAAGTACTCTGCGTTGATACCACTGCTT  
599 .

600

601

## 602 **Annotation quality definitions**

603 We utilized the common metrics sensitivity, specificity and accuracy to compare  
604 the annotation features. These metrics have been previously discussed in the

605 context of annotations [7]. Briefly, Sensitivity is a measure of how well an  
606 annotation identifies the known features of a reference, also called a true positive  
607 rate. For our comparisons, sensitivity can be represented as  $[(\text{Annotation}$   
608  $\text{matching reference} / \text{total Reference}) * 100]$  for a specific feature of interest and  
609 represents the percentage of known reference features captured. Specificity is a  
610 measure of how many of the annotated features are in the reference, also called  
611 positive predictive value. For our comparisons, specificity can be represented as  
612 the  $[(\text{Annotation matching reference} / \text{total Annotation}) * 100]$  for a specific  
613 feature of interest and represents the percentage of all the annotation features  
614 that match the reference. These comparisons can be for any annotation feature  
615 such as genes, transcripts, or individual exons for exact matches or for a  
616 specified overlap to a reference. Accuracy takes both sensitivity and specificity  
617 into account and can be represented as  $[(\text{Sensitivity} + \text{Specificity}) / 2]$ .

618

### 619 **Head to head comparisons between annotations**

620 To determine the unique protein coding genes annotated between LoReAn-sF,  
621 BAP-F, MAKER2 and CodingQuarry we compared the annotations using  
622 orthoMCL [40]. OrthoMCL was downloaded from  
623 <https://github.com/apetkau/orthomcl-pipeline> and run using default settings.

624

### 625 **Intron analysis**

626 Introns were extracted from mapped reads using the same methodology from  
627 BRAKER1 [10]. Introns supported from at least two reads were extracted and

628 used in the intron set. Genome tool software [56] was used to annotate introns in  
629 the gff3 file. Custom scripts were used to identify exact match intron coordinates  
630 from the annotation files were overlapped to the intron coordinates from the  
631 RNA-seq data. Sensitivity, specificity and accuracy were calculated as described  
632 before.

633

### 634 ***Ave1* isoform analysis**

635 *Ave1* isoforms were confirmed using cDNA-PCR of infected plant material with *V.*  
636 *dahliae* strain JR2. Specific primer for the *Ave1* gene (F-  
637 TTTAACACTTCACTCTGCTCTCG; R-CCTTGTGTGCTGCTTTGGTA ) and for  
638 *Ave1c* gene (F-CGCCGGCAATACTATCTCAA; R-  
639 ATCCTGTGGGCAACAATAGC) were used to identify the two *Ave1* isoforms.  
640 The two forward primers were used to confirm a genomic amplification product,  
641 but to disprove a cDNA fusion.

642

### 643 **DECLARATIONS**

### 644 **Acknowledgements**

645 We thank Jordi Coolen for his assistance in writing the LoReAn software.

646

### 647 **Availability of data and materials**

648 The LoReAn source code is available at: <https://github.com/lfaino/LoReAn/> and  
649 provided under an MIT license, available at:  
650 <https://github.com/lfaino/LoReAn/blob/master/LICENSE>. Documentation is

651 available at <https://github.com/lfaino/LoReAn>. The software can run on all  
652 platforms when deployed via Docker (<https://www.docker.com/>).

653 The *V. dahliae* strain JR2 reference annotation version 5 was used in the  
654 analysis. The version 5 was generated by comparing the concordance of all gene  
655 models of version 4 with the long reads information. Subsequently, the improved  
656 version 5 was deposited at ENSEMBL fungi database and can be downloaded at  
657 [http://fungi.ensembl.org/Verticillium\\_dahliaejr2/Info/Index](http://fungi.ensembl.org/Verticillium_dahliaejr2/Info/Index).

658 The *P. crisper* reference genome and annotation were downloaded from JGI  
659 (<http://genome.jgi.doe.gov/pages/dynamicOrganismDownload.jsf?organism=Plicr>  
660 [1](#)). The Arabidopsis genome sequence and reference annotation were

661 downloaded from the TAIR database  
662 ([ftp://ftp.arabidopsis.org/home/tair/Sequences/whole\\_chromosomes/](ftp://ftp.arabidopsis.org/home/tair/Sequences/whole_chromosomes/);

663 [https://www.arabidopsis.org/download\\_files/Genes/TAIR10\\_genome\\_release/TAIR10\\_gff3/TAIR10\\_GFF3\\_genes.gff](https://www.arabidopsis.org/download_files/Genes/TAIR10_genome_release/TAIR10_gff3/TAIR10_GFF3_genes.gff)). The rice genome sequence and annotation

665 were retrieved from the ENSEMBL plant database  
666 ([http://plants.ensembl.org/Oryza\\_sativa/Info/Index](http://plants.ensembl.org/Oryza_sativa/Info/Index)). The sequencing data are

667 accessible at the NCBI SRA database. The short-read *A. thaliana* data set is  
668 deposited under SRA accession number SRR5446746 and the PacBio dataset  
669 under SRA accession number SRR5445910. The *V. dahliae* Illumina

670 transcriptome is deposited under accession number SRR5440696 while the  
671 Nanopore transcriptome data is deposited as SRR5445874. The *P. crisper*

672 PacBio reads were downloaded from the publicly accessible NCBI SRA site, runs  
673 SRR5077068 to SRR5077144 and Illumina data from run SRR1577770. The *O.*

674 *sativa* data were downloaded from the European Nucleotide Archive (ENA) under  
675 runs ERR91110 and ERR911111 and the Illumina data from run ERR748773.

676 All genome annotations, scripts and additional files generated and/or analyzed in  
677 the paper can be found at <https://github.com/lfaino/files-paper-LoReAn.git>.

678 A dataset to test the correct installation of the tool can be found at  
679 [https://github.com/lfaino/LoReAn\\_Example.git](https://github.com/lfaino/LoReAn_Example.git). This dataset contains all the data  
680 to annotate a single chromosome of *V. dahliae* strain JR2.

681

## 682 **Funding**

683 Funding was provided to DEC by the Human Frontier Science Program (HFSP)  
684 Long-term fellowship (LT000627/2014-L). Work in the laboratory of BPJHT is  
685 supported by a Vici grant of the Research Council for Earth and Life Sciences  
686 (ALW) of the Netherlands Organization for Scientific Research (NWO). The  
687 Arabidopsis long read sequencing was performed within the ZonMw-project  
688 number 435003020 entitled "Arabidopsis transcript isoform identification using  
689 PacBio sequencing technology".

690

## 691 **Authors' contributions**

692 LF and BT conceived the project. DEC performed data collection for the Illumina  
693 sequencing and JVI performed the cDNA normalization and sequencing on the  
694 Minion with help from DEC. AP performed the Arabidopsis short- and long-read  
695 experiments. HR performed experiments to confirm the annotation results for the  
696 *Ave1* locus. LF and JVI wrote the LoReAn python script. LF ran the annotations



697 and LF and DEC performed the analysis. DEC wrote the paper with LF and BT.

698 Funding, guidance and oversight of the project were provided by BT.

699

## 700 **Competing interests**

701 The authors declare that they have no competing interests.

702

## 703 **Ethics approval and consent to participate**

704 Ethics approval is not applicable for this study.

705

## 706 **Figure Legends**

707 Fig. 1 Schematic overview of the LoReAn pipeline and clustered transcript  
708 reconstruction

709 **a** Illustration of the computational workflow for the LoReAn pipeline. Grey boxes  
710 represent input data and each white box represents a step in the annotation  
711 process with mention of the specific software. The boxes connected by blue  
712 arrows integrate the steps from the previously described BAP [20]. The LoReAn  
713 pipeline (boxes connected by red arrows) integrates the BAP workflow, but  
714 additionally incorporates long-read sequencing data. The orange box, 'Final BAP  
715 annotation' represents the annotation results from the BAP pipeline used for  
716 comparison in this study. Dashed arrows represent optional steps for the  
717 pipeline. **b** Illustration of the clustered transcript reconstruction. Gene models are  
718 depicted as exons (boxes) and connecting introns (lines). Blue models represent  
719 BAP annotations, while red models represent hypothetical long-reads mapped to

720 the genome. Orange models represent consensus annotations reported in the  
721 final LoReAn output. Various scenarios can occur: i: High confidence predictions  
722 from the BAP are kept regardless of whether they are supported by long-reads. ii  
723 & iii: Clusters of mapped long-reads are used to generate a consensus prediction  
724 model, unless the model is supported by less than a user-defined minimum  
725 depth. iv: Overlapping BAP and mapped long-reads are combined to a  
726 consensus model. v: Two annotations are reported if no consensus can be  
727 reached for the BAP and clustered long-read data.

728

729 Fig. 2 Annotation quality summary for exact match genes to the reference. **a**  
730 Each horizontal bar represents an annotation output, and each colored dot  
731 represents the sensitivity (green), specificity (purple) and accuracy (red). The  
732 annotations are labelled using the left grid table, where the group of horizontal  
733 black dots defines the parameters used in the annotation. Possible parameters  
734 include using the LoReAn, BAP or BAP+ pipeline, stranded mode for LoReAn  
735 (Stranded), the fungus option for GeneMark-ES (Fungus), or the BRAKER1  
736 program for Augustus (BRAKER1). Each set of 16 annotations are grouped by  
737 the level of reference masking, Partially Masked, Non-Masked or Fully Masked  
738 (right label). The results from additionally tested annotation pipelines are shown  
739 at the bottom. The four annotations highlighted with a yellow horizontal bar were  
740 used for subsequent analysis. **b** Sensitivity and specificity for exact match genes  
741 and exons for the best annotations highlighted in yellow in a. For the sensitivity  
742 column, the number N represents the number of reference features, and the

743 green sector of the pie chart shows the sensitivity. For example, the top  
744 sensitivity chart indicates that the LoReAn-sF pipeline annotated 57.5% (6,546)  
745 of the reference annotations 11,385 genes with exact feature matches.

746

747 Fig. 3 Comparison of the unique genes annotated from each of the four pipelines  
748 **a** To directly compare the annotation output from the four pipelines against each  
749 other, we identified the number of exact match genes across the four  
750 annotations. The Venn diagram shows that 4,646 genes were annotated with the  
751 exact same features across all four pipelines. The numbers captured by only a  
752 single annotation pipeline are considered singletons- genes whose structure is  
753 uniquely annotated by a given pipeline. Note, these singletons do not necessarily  
754 represent unique loci. **b** The percent length of each gene model covered by  
755 RNA-sequencing data is shown as a bar chart for each annotation pipeline. Each  
756 box plot represents the standard interquartile ranges and each dot represents a  
757 data point. An ANOVA was calculated for each metric, such as singleton  
758 coverage ~ pipeline, and post-hoc tested using Tukey Honestly Significant  
759 Difference (HSD) with  $\alpha = 0.05$ . Letters shown above each box plot  
760 represents the HSD groupings. **c** Same as in b except the lengths of each  
761 predicted model were analyzed as log<sub>2</sub> values. **d** The orthoMCL singletons from  
762 each pipeline were grouped into one of four categories shown in the key  
763 representing if the singleton contained an intron or not and if the singleton's  
764 length was covered by over 75% with RNA-seq data. The number of singletons  
765 within each of the four categories is shown.

766

767 Fig. 4 LoReAn gene predictions are the most accurate based on analysis of  
768 intron location. The quality of 55 gene predictions using the *V. dahliae* genome  
769 were assessed using exact intron matches Sensitivity (y-axis) and specificity (x-  
770 axis) were mapped, and the symbols represent their accuracy (average of  
771 sensitivity and specificity). The dashed black and red lines represent 70% and  
772 80% accuracy respectively. Individual predictions with an accuracy greater than  
773 75% or lower than 68%, along with the independent pipelines are labeled in  
774 colored boxes connected to their corresponding points with a grey line. The  
775 results of the *V. dahliae* JR2 strain annotation compared to the mapped introns is  
776 shown in black, labeled VDAG\_Jr2\_Annotation.v5. s – stranded; B – Braker1; F –  
777 Fungus option.

778

779 Fig. 5 The LoReAn pipeline most accurately annotates a specific fungal locus  
780 encoding a strain specific gene. **a** Short-read RNA-seq data mapped to the locus  
781 are shown as a coverage plot (grey peaks) and as representative individual  
782 reads (yellow boxes). Long-reads from single-molecule cDNA data mapped to  
783 the locus are shown as a coverage plot (grey peaks) and representative reads  
784 (purple boxes). Thin black lines linked mapped reads represent gaps in the  
785 mapped reads and are indicative of introns. The long-read data was split by  
786 mapping strand and coverage plots for forward (red) and reverse (blue) coverage  
787 plots. **b** Gene model predictions from the four annotation pipelines are illustrated.  
788 Light blue boxes represent untranslated regions (5' and 3' UTR), dark blue boxes

789 represent coding sequence boundaries, and thin black lines depict introns.  
790 Arrows in the introns indicate the direction of transcription. The MAKER2 and  
791 BAP pipelines predict a single transcript coded on the reverse strand at the 3'  
792 end of the known *Ave1* transcript. Coding Quarry does not predict a gene at the  
793 locus. LoReAn predicts two transcripts corresponding to the *Ave1* gene along  
794 with the similar transcript predicted by MAKER2 and BAP. The reference *Ave1*  
795 transcript is shown in grey. **c** To confirm the presence of an alternative splice site  
796 in the 5'UTR of the *Ave1* transcript, 18 cDNA clones were randomly chosen and  
797 sequenced. Isoform 1 sequence is identical to the reference *Ave1* sequence and  
798 was identified in 15 of the 18 clones. Isoform 2 has a 5 bp insertion in the 5'UTR  
799 resulting from an alternative exon splice site and was identified in 3 of the 18  
800 sequenced clones. The *Ave1* reference sequence is shown from bases 71  
801 through 86. **d** The presence of *Ave1* and the additional gene transcribed to the 3'  
802 end of *Ave1*, termed *Ave1close(Ave1c)*, was confirmed using PCR on gDNA and  
803 cDNA. PCR using gene specific primers, termed *Ave1* fw + rev (pink arrows) or  
804 *Ave1c* for + rev (yellow arrows), shows that both genes are expressed in either  
805 potato dextrose broth (PDB) Czapek-dox (CPD) or half-strength Murashige-  
806 Skoog (1/2MS) media. The inverse orientation of the two genes was confirmed  
807 using forward primers only, which amplified the entire locus resulting in a band of  
808 approximately 1,118 bp, but does not amplify product using cDNA as the  
809 template.

810

811

812 Fig. 6 LoReAn gene predictions improve the current *P. crispera* reference  
813 annotation.

814 **a** Annotation quality metrics are shown for exact match genes, transcripts and  
815 exons labeled at the top of the respective plots. Each horizontal bar represents  
816 an annotation output, and each colored dot represents the sensitivity (green),  
817 specificity (purple) and accuracy (red). Each output is labeled on the right.  
818 LoR\_NS\_M - LoReAn non-stranded using masked input genome; LoR\_NS -  
819 LoReAn non-stranded; LoR\_S\_M - LoReAn stranded using masked input  
820 genome; LoR\_S - LoReAn stranded. **b** The quality of the annotation pipelines  
821 shown was assessed independent of a reference, using the exact match intron  
822 location between the gene predictions and those inferred from the short- and  
823 long-read mapping data. Sensitivity (y-axis) and specificity (x-axis) were mapped  
824 and the average represents their accuracy. The dashed black, red and green  
825 lines represent 70%, 80%, and 90% accuracy respectively. Abbreviations are the  
826 same as previously detailed. The result from the *P. crispera* reference annotation  
827 analysis is shown in black, labeled *P. crispera*\_Annot.

828

829 Fig. 7 High accuracy LoReAn genome annotations for two plant genomes.

830 **a, c** Annotation quality metrics are shown for exact match genes, transcripts  
831 and exons labeled at the top of the respective plots as detailed in figure 6. **a, b**  
832 Data for *A. thaliana* **c, d** Data for *O. sativa* **b, d** The quality of the annotation  
833 pipelines shown were assessed independent of a reference, using the exact  
834 match intron location between the gene predictions and those inferred from the

835 short- and long-read mapping data as detailed in figure 6. **b** The result from the  
836 *A. thaliana* reference annotation analysis is shown in black, labeled  
837 TAIR10\_Annot. **d** The result from the *O. sativa* reference annotation analysis is  
838 shown in black, labeled O\_sativa.IRGSP.

839

#### 840 **Additional files**

841 Additional file 1: This file contains additional text and Figures S1-S5

842 Additional file 2: This file contains Tables S1-S4

843

#### 844 **References**

845 1. Koren S, Phillippy AM. One chromosome, one contig: complete microbial genomes  
846 from long-read sequencing and assembly. *Curr. Opin. Microbiol.* 2015;23:110–20.

847 2. Faino L, Seidl MF, Datema E, van den Berg GCM, Janssen A, Wittenberg AHJ, et al.  
848 Single-Molecule Real-Time Sequencing Combined with Optical Mapping Yields  
849 Completely Finished Fungal Genome. *mBio. American Society for Microbiology*;  
850 2015;6:e00936–15.

851 3. Chin C-S, Peluso P, Sedlazeck FJ, Nattestad M, Concepcion GT, Clum A, et al.  
852 Phased diploid genome assembly with single-molecule real-time sequencing. *Nat.*  
853 *Methods.* 2016;13:1050–4.

854 4. Jiao W-B, Schneeberger K. The impact of third generation genomic technologies on  
855 plant genome assembly. *Current Opinion in Plant Biology.* 2017;36:64–70.

856 5. Davey JW, Chouteau M, Barker SL, Maroja L, Baxter SW, Simpson F, et al. Major  
857 Improvements to the *Heliconius melpomene* Genome Assembly Used to Confirm 10  
858 Chromosome Fusion Events in 6 Million Years of Butterfly Evolution. *G3 (Bethesda).*  
859 2016;6:695–708.

860 6. Thomma BPHJ, Seidl MF, Shi-Kunne X, Cook DE, Bolton MD, van Kan JAL, et al.  
861 Mind the gap; seven reasons to close fragmented genome assemblies. *Fungal Genet.*  
862 *Biol.* 2016;90:24–30.

863 7. Yandell M, Ence D. A beginner's guide to eukaryotic genome annotation. *Nature*  
864 *Reviews Genetics.* Nature Publishing Group; 2012;13:329–42.

865 8. Cantarel BL, Korf I, Robb SMC, Parra G, Ross E, Moore B, et al. MAKER: an easy-to-  
866 use annotation pipeline designed for emerging model organism genomes. *Genome Res.*  
867 *Cold Spring Harbor Lab*; 2008;18:188–96.

- 868 9. Goodswen SJ, Kennedy PJ, Ellis JT. Evaluating high-throughput ab initio gene finders  
869 to discover proteins encoded in eukaryotic pathogen genomes missed by laboratory  
870 techniques. Tramontano A, editor. PLoS ONE. Public Library of Science;  
871 2012;7:e50609.
- 872 10. Hoff KJ, Lange S, Lomsadze A, Borodovsky M, Stanke M. BRAKER1: Unsupervised  
873 RNA-Seq-Based Genome Annotation with GeneMark-ET and AUGUSTUS.  
874 Bioinformatics. Oxford University Press; 2016;32:767–9.
- 875 11. Wang Z, Gerstein M, Snyder M. RNA-Seq: a revolutionary tool for transcriptomics.  
876 Nature Reviews Genetics. Nature Publishing Group; 2009;10:57–63.
- 877 12. Smith CD, Zimin A, Holt C, Abouheif E, Benton R, Cash E, et al. Draft genome of the  
878 globally widespread and invasive Argentine ant (*Linepithema humile*). Proc. Natl. Acad.  
879 Sci. U.S.A. National Acad Sciences; 2011;108:5673–8.
- 880 13. Amemiya CT, Alföldi J, Lee AP, Fan S, Philippe H, Maccallum I, et al. The African  
881 coelacanth genome provides insights into tetrapod evolution. Nature. Nature Research;  
882 2013;496:311–6.
- 883 14. Smith JJ, Kuraku S, Holt C, Sauka-Spengler T, Jiang N, Campbell MS, et al.  
884 Sequencing of the sea lamprey (*Petromyzon marinus*) genome provides insights into  
885 vertebrate evolution. Nature Genetics. Nature Research; 2013;45:415–21–421e1–2.
- 886 15. Ming R, VanBuren R, Wai CM, Tang H, Schatz MC, Bowers JE, et al. The pineapple  
887 genome and the evolution of CAM photosynthesis. Nature Genetics. Nature Research;  
888 2015;47:1435–42.
- 889 16. Lamichhaney S, Fan G, Widemo F, Gunnarsson U, Thalmann DS, Hoepfner MP, et  
890 al. Structural genomic changes underlie alternative reproductive strategies in the ruff  
891 (*Philomachus pugnax*). Nature Genetics. Nature Research; 2016;48:84–8.
- 892 17. Muñoz JF, Gauthier GM, Desjardins CA, Gallo JE, Holder J, Sullivan TD, et al. The  
893 Dynamic Genome and Transcriptome of the Human Fungal Pathogen *Blastomyces* and  
894 Close Relative *Emmonsia*. Haridas S, editor. PLoS Genet. Public Library of Science;  
895 2015;11:e1005493.
- 896 18. Linde J, Duggan S, Weber M, Horn F, Sieber P, Hellwig D, et al. Defining the  
897 transcriptomic landscape of *Candida glabrata* by RNA-Seq. Nucleic Acids Res. Oxford  
898 University Press; 2015;43:1392–406.
- 899 19. Ma L, Chen Z, Huang DW, Kutty G, Ishihara M, Wang H, et al. Genome analysis of  
900 three *Pneumocystis* species reveals adaptation mechanisms to life exclusively in  
901 mammalian hosts. Nature Communications. Nature Publishing Group; 2016;7:10740.
- 902 20. Haas BJ, Salzberg SL, Zhu W, Pertea M, Allen JE, Orvis J, et al. Automated  
903 eukaryotic gene structure annotation using EVIDENCEModeler and the Program to  
904 Assemble Spliced Alignments. Genome Biol. BioMed Central; 2008;9:R7.
- 905 21. Haas BJ, Zeng Q, Pearson MD, Cuomo CA, Wortman JR. Approaches to Fungal  
906 Genome Annotation. Mycology. Taylor & Francis; 2011;2:118–41.



- 907 22. Testa AC, Hane JK, Ellwood SR, Oliver RP. CodingQuarry: highly accurate hidden  
908 Markov model gene prediction in fungal genomes using RNA-seq transcripts. *BMC*  
909 *Genomics*. BioMed Central; 2015;16:170.
- 910 23. Phillippy AM. New advances in sequence assembly. *Genome Res*. Cold Spring  
911 Harbor Lab; 2017;27:xi–xiii.
- 912 24. Minoche AE, Dohm JC, Schneider J, Holtgräwe D, Viehöver P, Montfort M, et al.  
913 Exploiting single-molecule transcript sequencing for eukaryotic gene prediction. *Genome*  
914 *Biol*. BioMed Central; 2015;16:184.
- 915 25. Wang B, Tseng E, Regulski M, Clark TA, Hon T, Jiao Y, et al. Unveiling the  
916 complexity of the maize transcriptome by single-molecule long-read sequencing. *Nature*  
917 *Communications*. Nature Publishing Group; 2016;7:11708.
- 918 26. Abdel-Ghany SE, Hamilton M, Jacobi JL, Ngam P, Devitt N, Schilkey F, et al. A  
919 survey of the sorghum transcriptome using single-molecule long reads. *Nature*  
920 *Communications*. Nature Publishing Group; 2016;7:11706.
- 921 27. Faino L, Thomma BPHJ. Get your high-quality low-cost genome sequence. *Trends*  
922 *in Plant Science*. 2014;19:288–91.
- 923 28. Laver T, Harrison J, O'Neill PA, Moore K, Farbos A, Paszkiewicz K, et al. Assessing  
924 the performance of the Oxford Nanopore Technologies MinION. *Biomol Detect Quantif*.  
925 2015;3:1–8.
- 926 29. Loman NJ, Quick J, Simpson JT. A complete bacterial genome assembled de novo  
927 using only nanopore sequencing data. *Nat. Methods*. 2015;12:733–5.
- 928 30. Laehnemann D, Borkhardt A, McHardy AC. Denoising DNA deep sequencing data-  
929 high-throughput sequencing errors and their correction. *Brief. Bioinformatics*. Oxford  
930 University Press; 2016;17:154–79.
- 931 31. Stanke M, Diekhans M, Baertsch R, Haussler D. Using native and syntenically  
932 mapped cDNA alignments to improve de novo gene finding. *Bioinformatics*.  
933 2008;24:637–44.
- 934 32. Grabherr MG, Haas BJ, Yassour M, Levin JZ, Thompson DA, Amit I, et al. Full-  
935 length transcriptome assembly from RNA-Seq data without a reference genome. *Nature*  
936 *Biotechnology*. 2011;29:644–52.
- 937 33. Wu TD, Watanabe CK. GMAP: a genomic mapping and alignment program for  
938 mRNA and EST sequences. *Bioinformatics*. Oxford University Press; 2005;21:1859–75.
- 939 34. Križanovic K, Echchiki A, Roux J, Šikic M. Evaluation of tools for long read RNA-seq  
940 splice-aware alignment. *Bioinformatics*. 2017.
- 941 35. Fradin EF, Thomma BPHJ. Physiology and molecular aspects of *Verticillium* wilt  
942 diseases caused by *V. dahliae* and *V. albo-atrum*. *Mol. Plant Pathol*. Blackwell  
943 Publishing Ltd; 2006;7:71–86.

- 944 36. Klosterman SJ, Atallah ZK, Vallad GE, Subbarao KV. Diversity, pathogenicity, and  
945 management of verticillium species. *Annu Rev Phytopathol. Annual Reviews*;  
946 2009;47:39–62.
- 947 37. Keibler E, Brent MR. Eval: a software package for analysis of genome annotations.  
948 *BMC Bioinformatics. BioMed Central*; 2003;4:50.
- 949 38. Chan K-L, Rosli R, Tatarinova TV, Hogan M, Firdaus-Raih M, Low E-TL. Seqping:  
950 gene prediction pipeline for plant genomes using self-training gene models and  
951 transcriptomic data. *BMC Bioinformatics. BioMed Central*; 2017;18:1426–7.
- 952 39. Chen F, Mackey AJ, Stoeckert CJ, Roos DS. OrthoMCL-DB: querying a  
953 comprehensive multi-species collection of ortholog groups. *Nucleic Acids Res.*  
954 2006;34:D363–8.
- 955 40. Li L, Stoeckert CJ, Roos DS. OrthoMCL: identification of ortholog groups for  
956 eukaryotic genomes. *Genome Res. Cold Spring Harbor Lab*; 2003;13:2178–89.
- 957 41. Cook DE, Mesarich CH, Thomma BPHJ. Understanding plant immunity as a  
958 surveillance system to detect invasion. *Annu Rev Phytopathol. Annual Reviews*;  
959 2015;53:541–63.
- 960 42. Presti Lo L, Lanver D, Schweizer G, Tanaka S, Liang L, Tollot M, et al. Fungal  
961 effectors and plant susceptibility. *Annu Rev Plant Biol. Annual Reviews*; 2015;66:513–  
962 45.
- 963 43. Sperschneider J, Dodds PN, Gardiner DM, Manners JM, Singh KB, Taylor JM.  
964 Advances and challenges in computational prediction of effectors from plant pathogenic  
965 fungi. Sheppard DC, editor. *PLoS Pathog. Public Library of Science*; 2015;11:e1004806.
- 966 44. de Jonge R, van Esse HP, Maruthachalam K, Bolton MD, Santhanam P, Saber MK,  
967 et al. Tomato immune receptor Ve1 recognizes effector of multiple fungal pathogens  
968 uncovered by genome and RNA sequencing. *Proc. Natl. Acad. Sci. U.S.A. National*  
969 *Acad Sciences*; 2012;109:5110–5.
- 970 45. Gordon SP, Tseng E, Salamov A, Zhang J, Meng X, Zhao Z, et al. Widespread  
971 Polycistronic Transcripts in Fungi Revealed by Single-Molecule mRNA Sequencing.  
972 Zheng D, editor. *PLoS ONE. Public Library of Science*; 2015;10:e0132628.
- 973 46. Kohler A, Kuo A, Nagy LG, Morin E, Barry KW, Buscot F, et al. Convergent losses of  
974 decay mechanisms and rapid turnover of symbiosis genes in mycorrhizal mutualists.  
975 *Nature Genetics. Nature Research*; 2015;47:410–5.
- 976 47. Lamesch P, Berardini TZ, Li D, Swarbreck D, Wilks C, Sasidharan R, et al. The  
977 Arabidopsis Information Resource (TAIR): improved gene annotation and new tools.  
978 *Nucleic Acids Res. Oxford University Press*; 2012;40:D1202–10.
- 979 48. Berardini TZ, Reiser L, Li D, Mezheritsky Y, Muller R, Strait E, et al. The Arabidopsis  
980 information resource: Making and mining the “gold standard” annotated reference plant  
981 genome. *Genesis*. 2015;53:474–85.

- 982 49. Au KF, Sebastiano V, Afshar PT, Durruthy JD, Lee L, Williams BA, et al.  
983 Characterization of the human ESC transcriptome by hybrid sequencing. *Proc. Natl.*  
984 *Acad. Sci. U.S.A. National Acad Sciences*; 2013;110:E4821–30.
- 985 50. Loman NJ, Quinlan AR. *Poretools: a toolkit for analyzing nanopore sequence data.*  
986 *Bioinformatics. Oxford University Press*; 2014;30:3399–401.
- 987 51. Dobin A, Davis CA, Schlesinger F, Drenkow J, Zaleski C, Jha S, et al. STAR:  
988 ultrafast universal RNA-seq aligner. *Bioinformatics. Oxford University Press*;  
989 2013;29:15–21.
- 990 52. Huang X, Adams MD, Zhou H, Kerlavage AR. A tool for analyzing and annotating  
991 genomic sequences. *Genomics. 1997*;46:37–45.
- 992 53. Lomsadze A, Burns PD, Borodovsky M. Integration of mapped RNA-Seq reads into  
993 automatic training of eukaryotic gene finding algorithm. *Nucleic Acids Res.*  
994 2014;42:e119–9.
- 995 54. Quinlan AR, Hall IM. *BEDTools: a flexible suite of utilities for comparing genomic*  
996 *features. Bioinformatics. Oxford University Press*; 2010;26:841–2.
- 997 55. Zheng Y, Zhao L, Gao J, Fei Z. *iAssembler: a package for de novo assembly of*  
998 *Roche-454/Sanger transcriptome sequences. BMC Bioinformatics. BioMed Central*;  
999 2011;12:453.
- 1000 56. Gremme G, Steinbiss S, Kurtz S. *GenomeTools: a comprehensive software library*  
1001 *for efficient processing of structured genome annotations. IEEE/ACM Trans Comput Biol*  
1002 *Bioinform.* 2013;10:645–56.
- 1003 57. Faino L, Seidl MF, Shi-Kunne X, Pauper M, van den Berg GCM, Wittenberg AHJ, et  
1004 al. Transposons passively and actively contribute to evolution of the two-speed genome  
1005 of a fungal pathogen. *Genome Res. Cold Spring Harbor Lab*; 2016;26:1091–100.
- 1006

**a**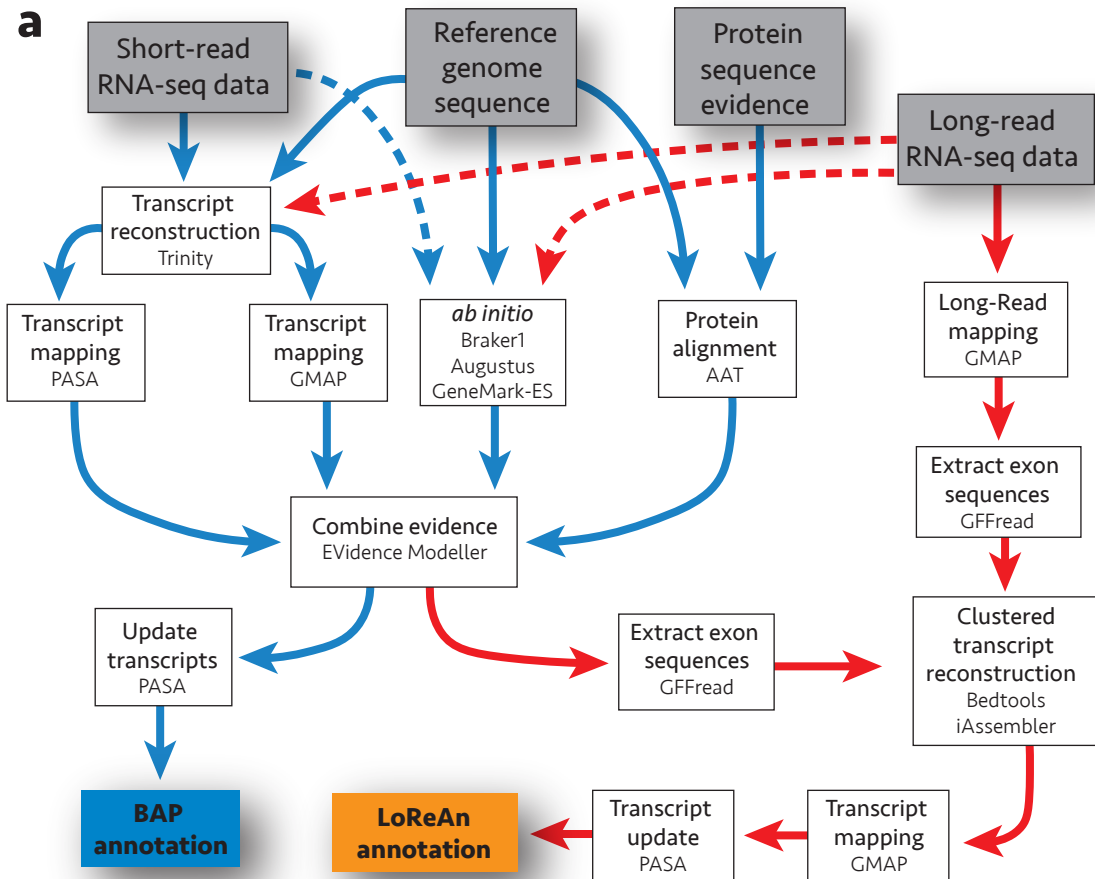**b****Clustered Transcript Reconstruction**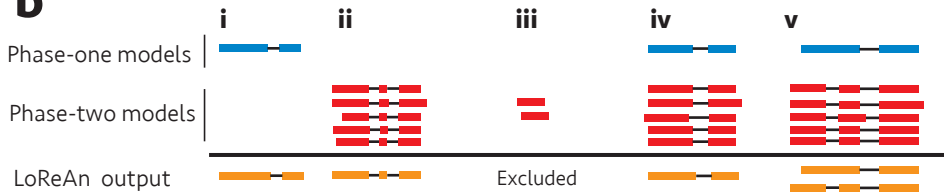

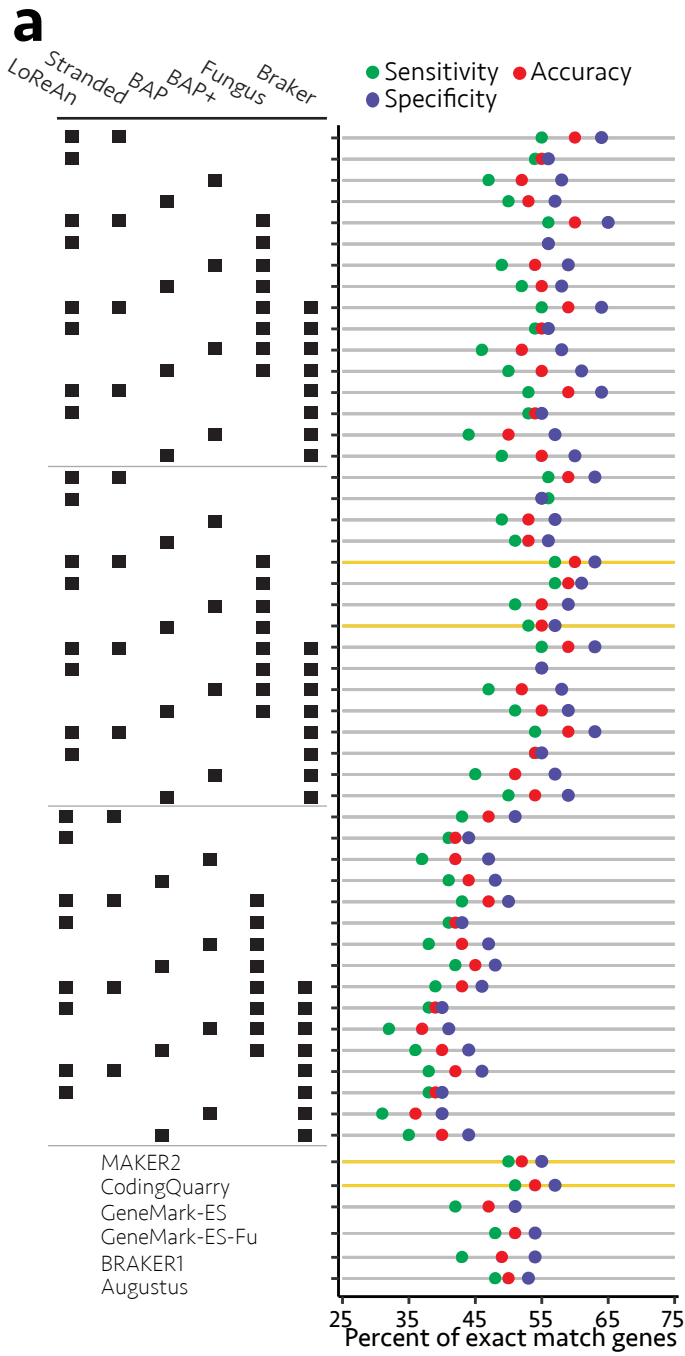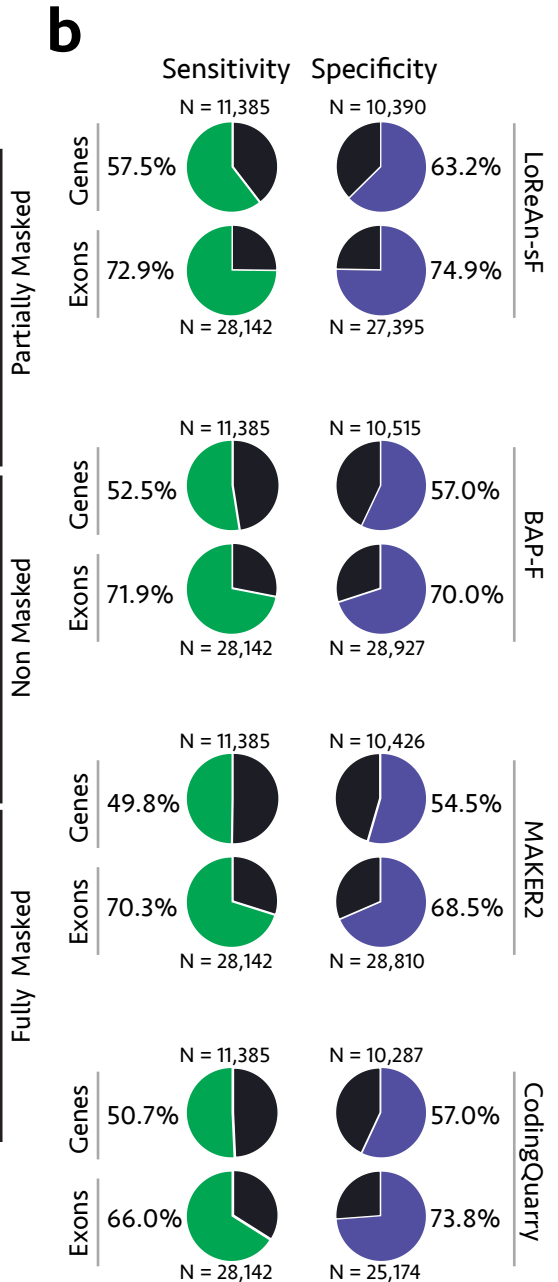

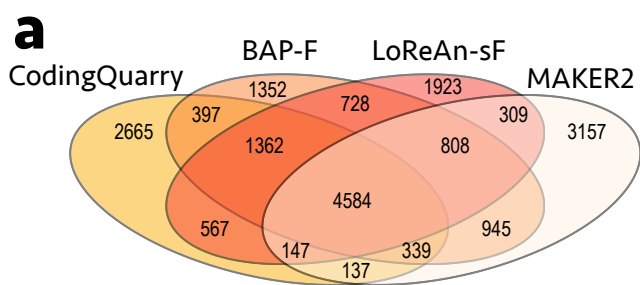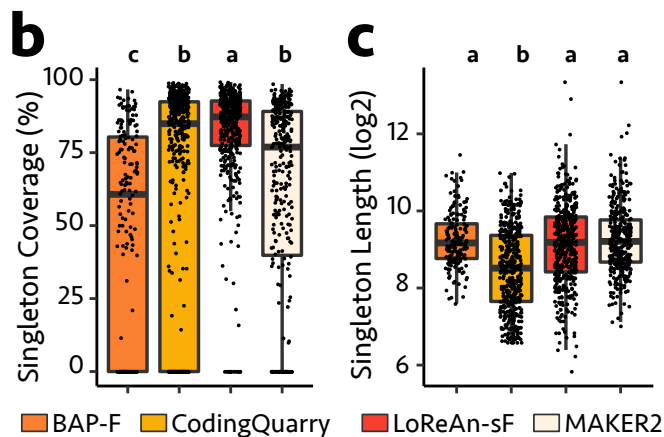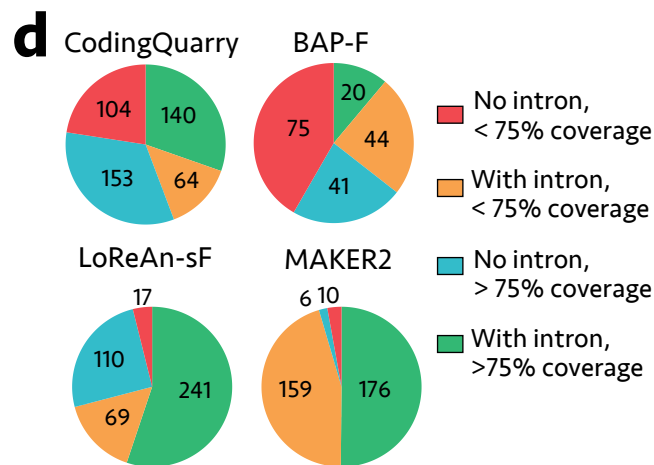

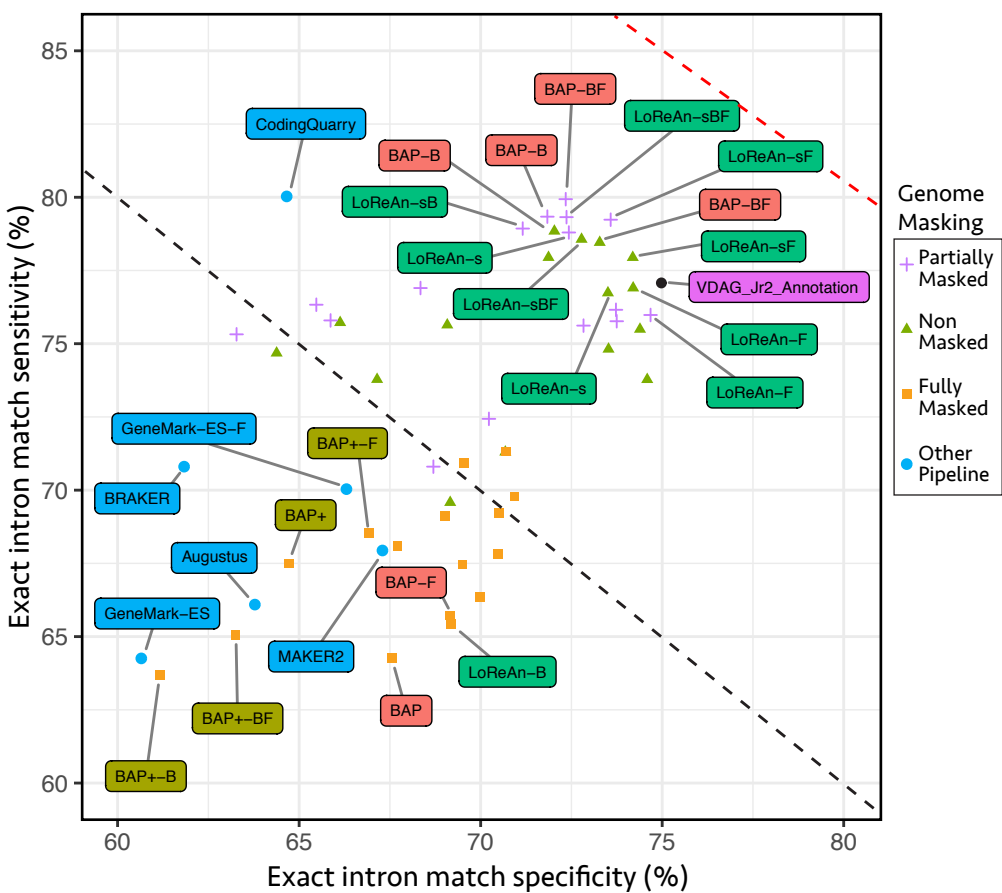

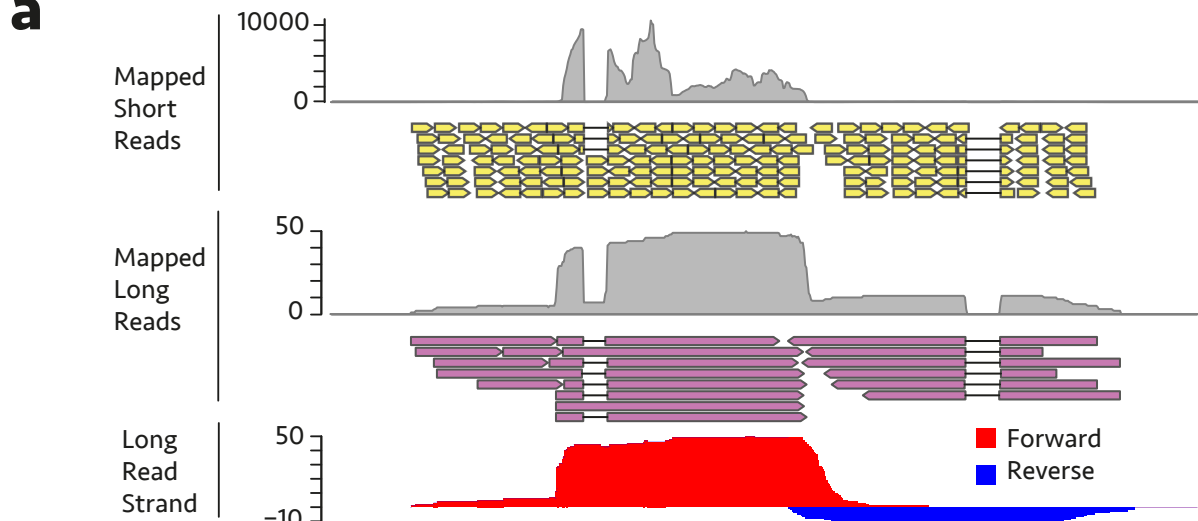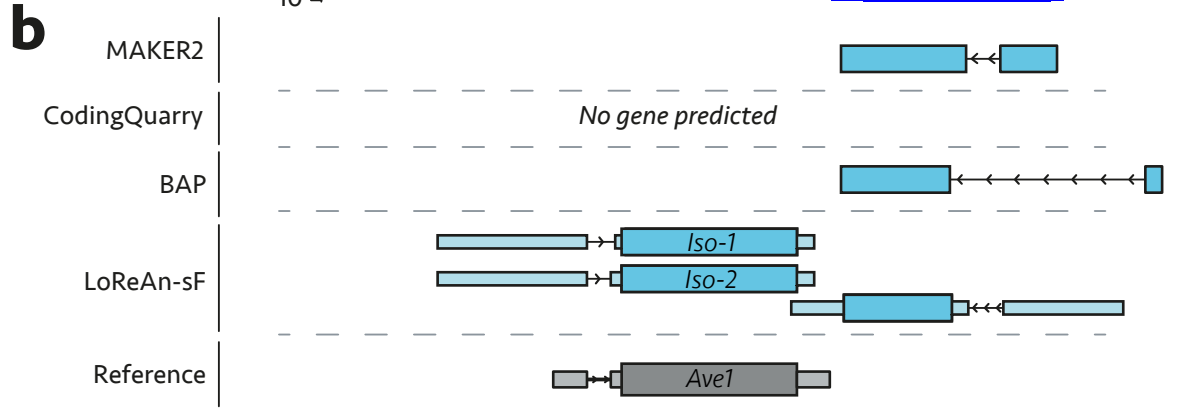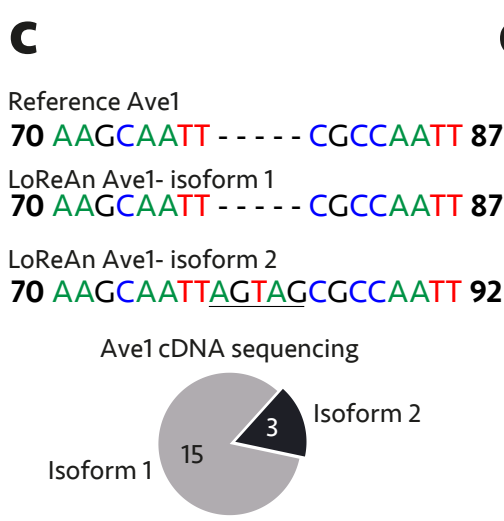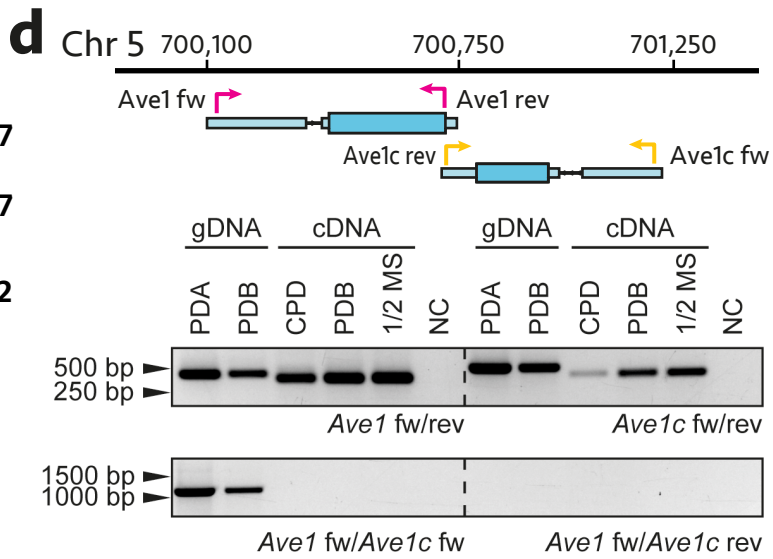



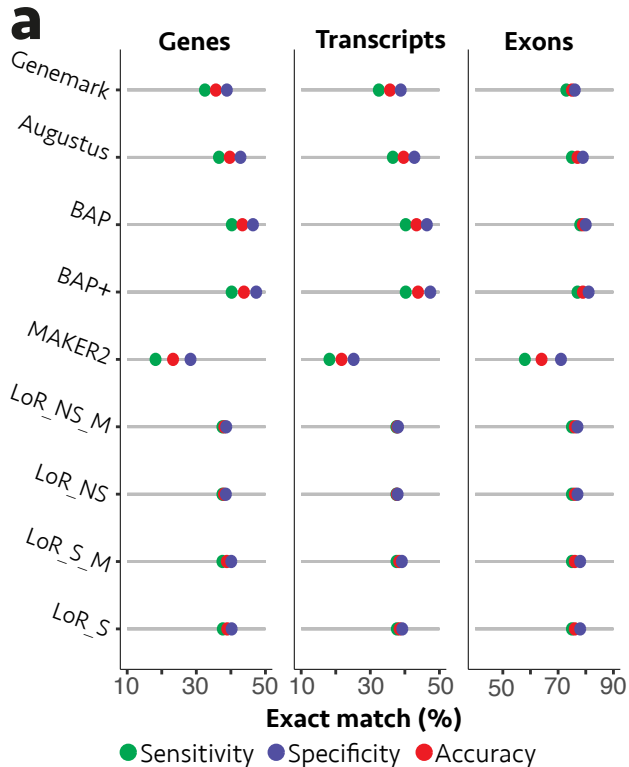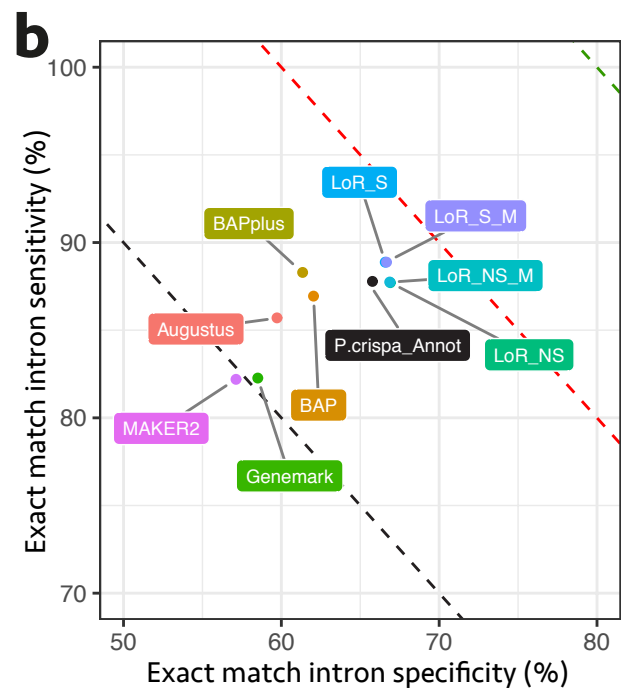

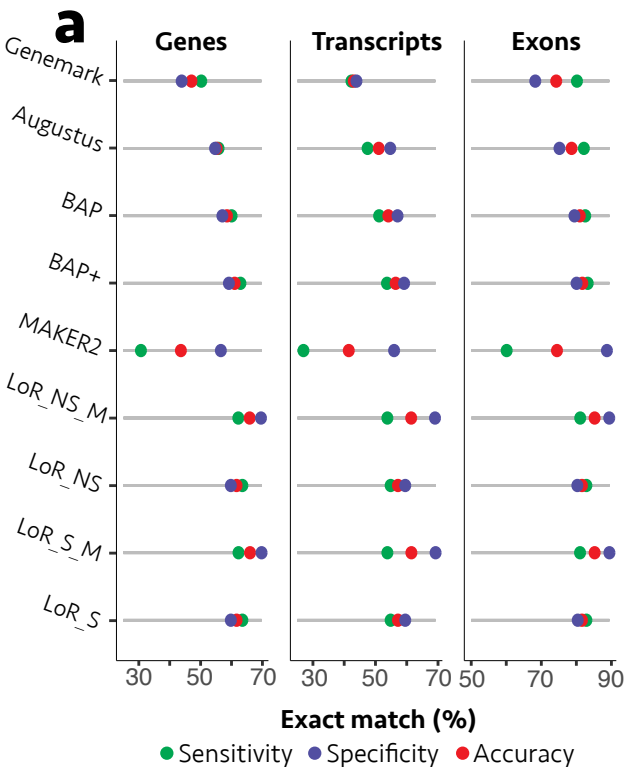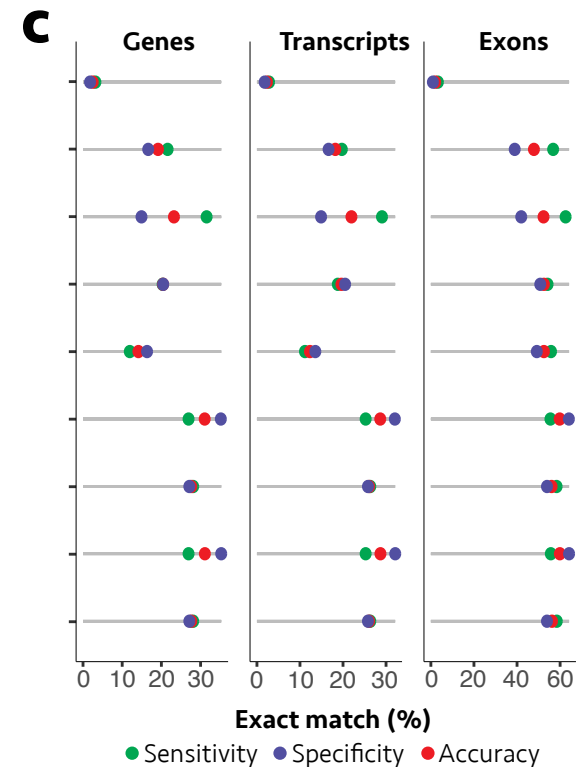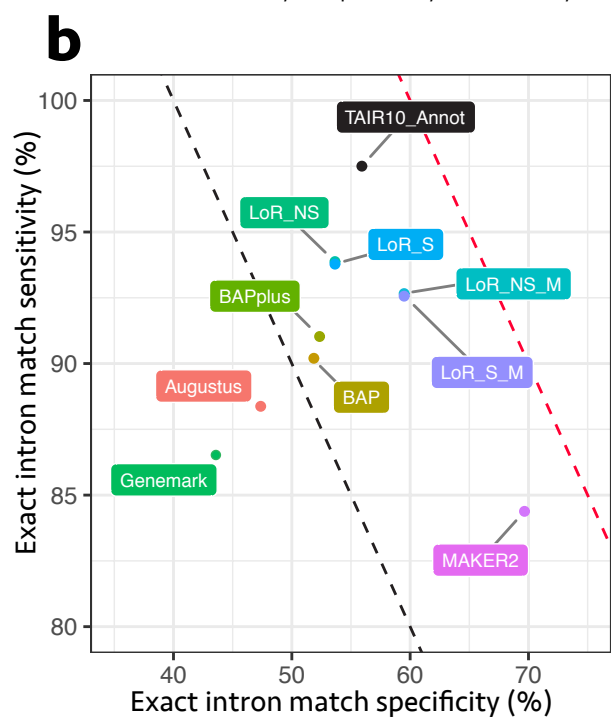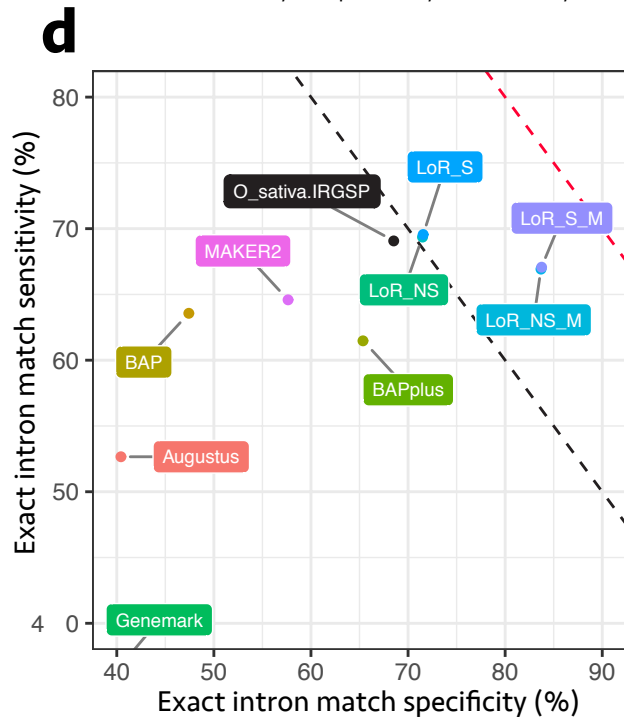

Source: http://biorxiv.org/content/10.1101/230359v1.full.pdf
